# Supplementary material for: Design, Synthesis, and Anticancer Activity Studies of Novel Quinoline-Chalcone Derivatives
Source: MDPI journal article supplement (doi:10.3390/molecules26164899), 2021-08-13
Supplement: s1 [file s1]

# **Design, Synthesis and Anticancer Activity Studies of Novel Quinoline-Chalcone Derivatives**

Yong-Feng Guan <sup>a</sup>, Xiu-Juan Liu <sup>c</sup>, Xin-Ying Yuan <sup>c</sup>, Wen-Bo Liu <sup>c</sup>, Yin-Ru Li <sup>b</sup>, Guang-Xi Yu <sup>b</sup>,  
Xin-Yi Tian <sup>b</sup>, Yan-Bing Zhang <sup>c</sup>, Jian Song <sup>c, \*</sup>, Wen Li <sup>a, c, \*</sup>, Sai-Yang Zhang <sup>b, \*</sup>

- a. School of Chemical Engineering, Zhengzhou University, Zhengzhou 450001, China.
- b. School of Basic Medical Sciences, Zhengzhou University, Zhengzhou, 450001, China
- c. School of Pharmaceutical Sciences, Institute of Drug Discovery & Development, Key Laboratory of Advanced Drug Preparation Technologies (Ministry of Education), Zhengzhou University, Zhengzhou, 450001, China
- \* Corresponding authors: mumuangzz@163.com (Jian Song), liwen@zzu.edu.cn (Wen Li), saiyangz@zzu.edu.cn (Sai-Yang Zhang)

# <sup>1</sup>H NMR of compound 12a

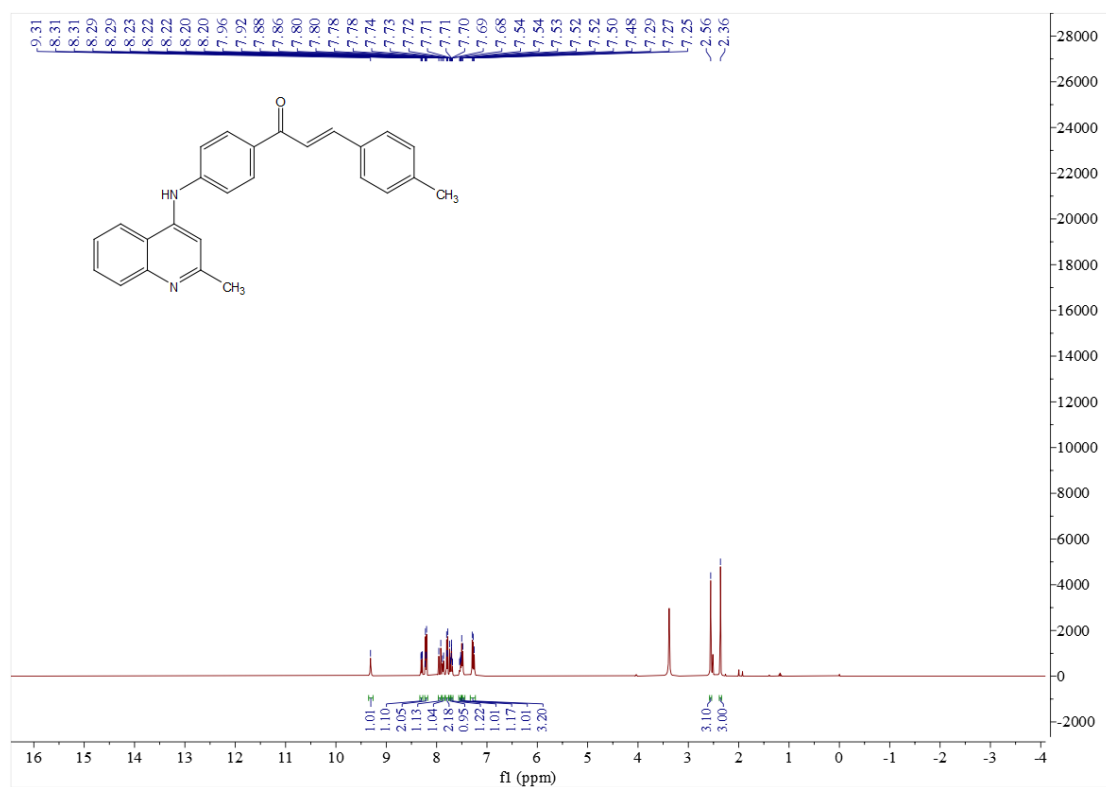

Figure S1. <sup>1</sup>H NMR spectrum of compound 12a

# <sup>13</sup>C NMR of compound 12a

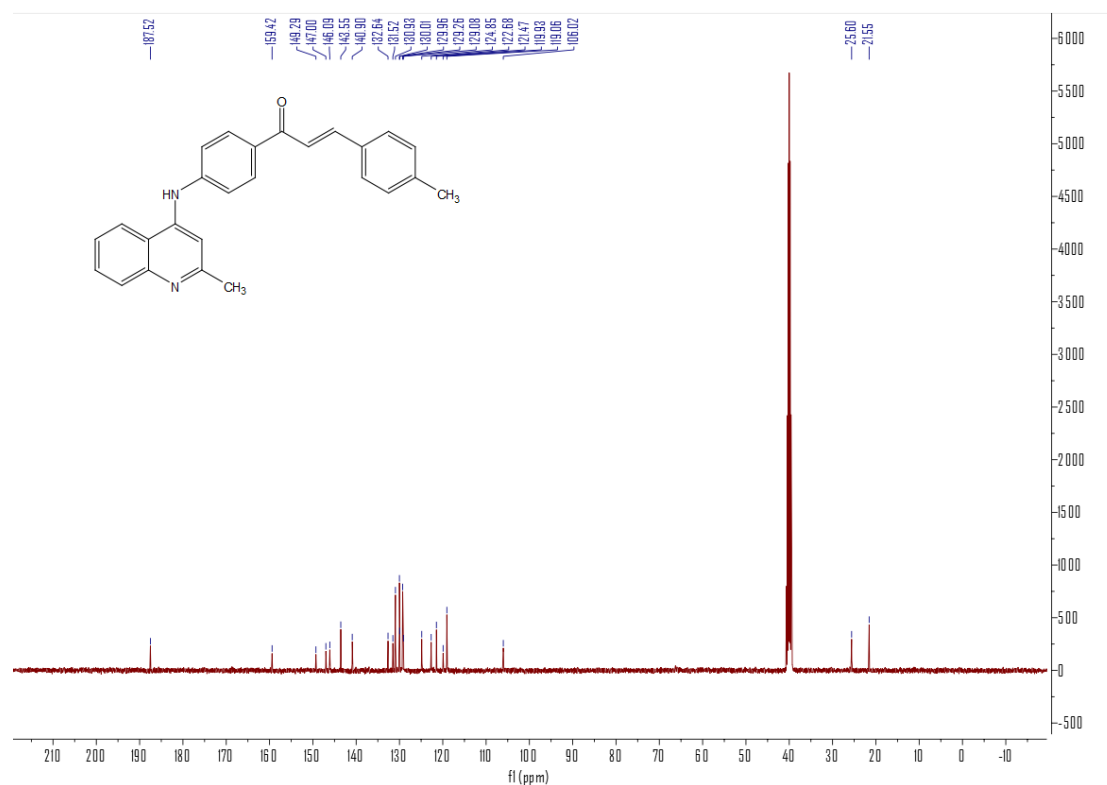

Figure S2 <sup>13</sup>C NMR spectrum of compound 12a

### HRMS spectrum of compound 12a

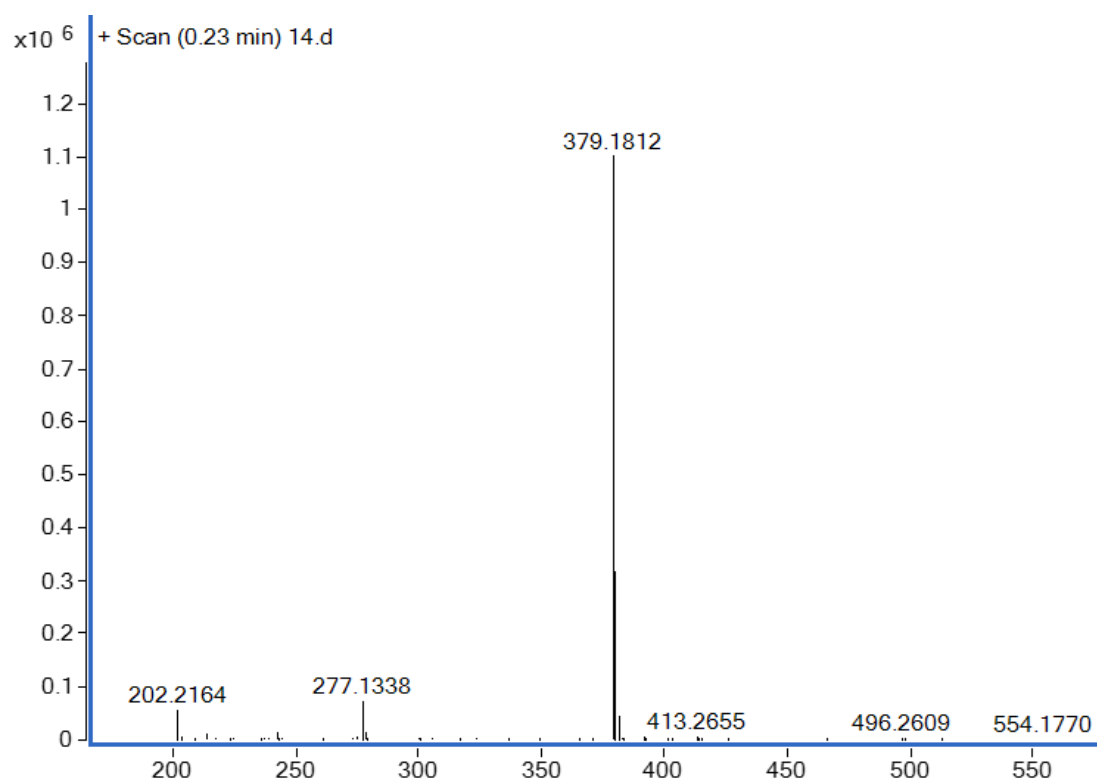

Figure S3 HRMS spectrum of compound 12a

# <sup>1</sup>H NMR of compound 12b

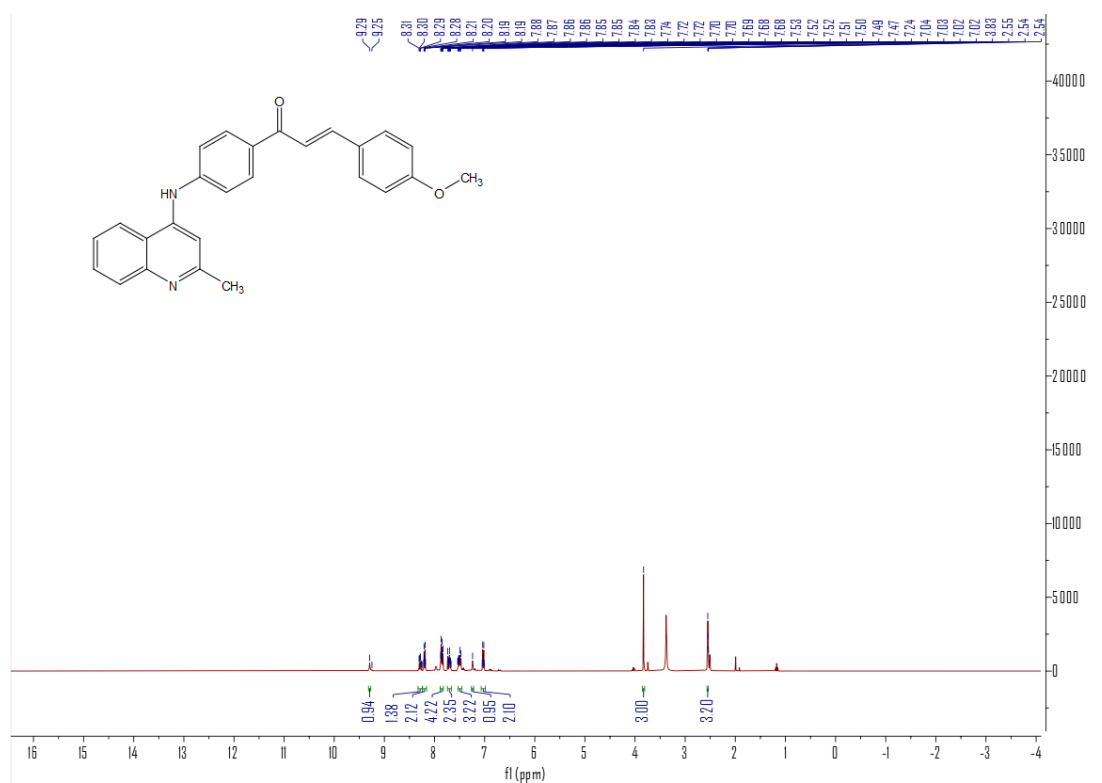

Figure S4 <sup>1</sup>H NMR spectrum of compound 12b

# <sup>13</sup>C NMR of compound 12b

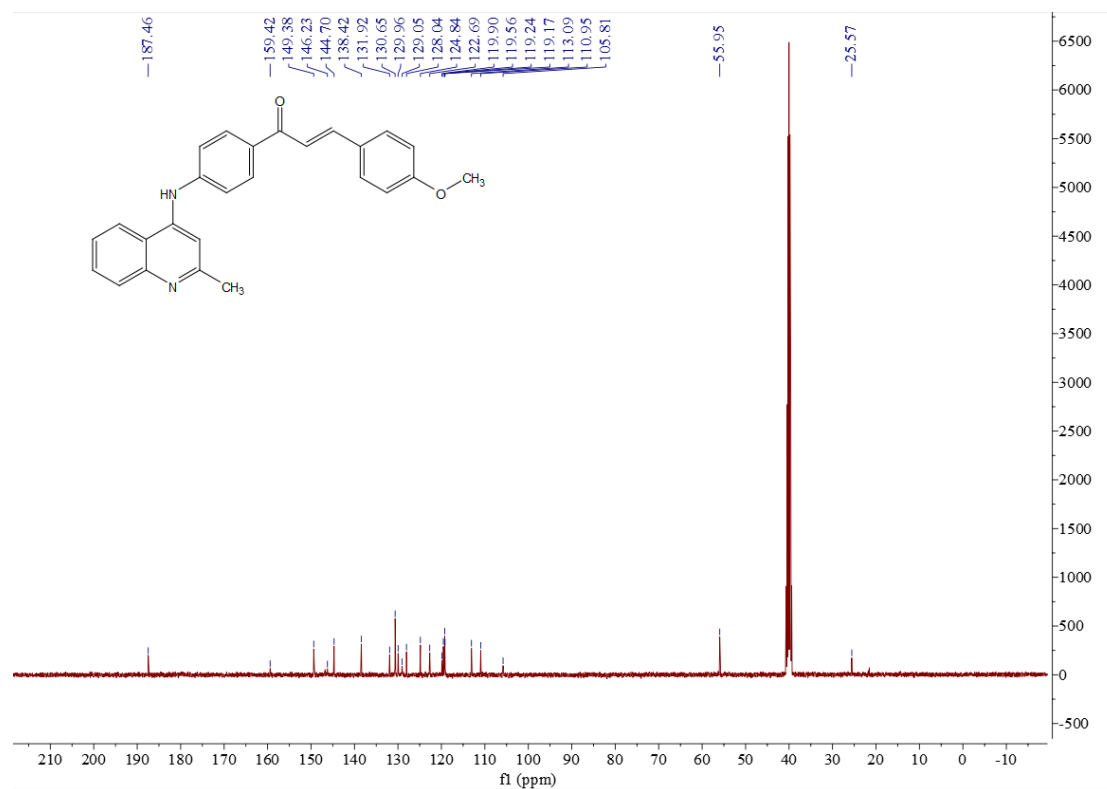

Figure S5 <sup>13</sup>C NMR spectrum of compound 12b

## HRMS spectrum of compound 12b

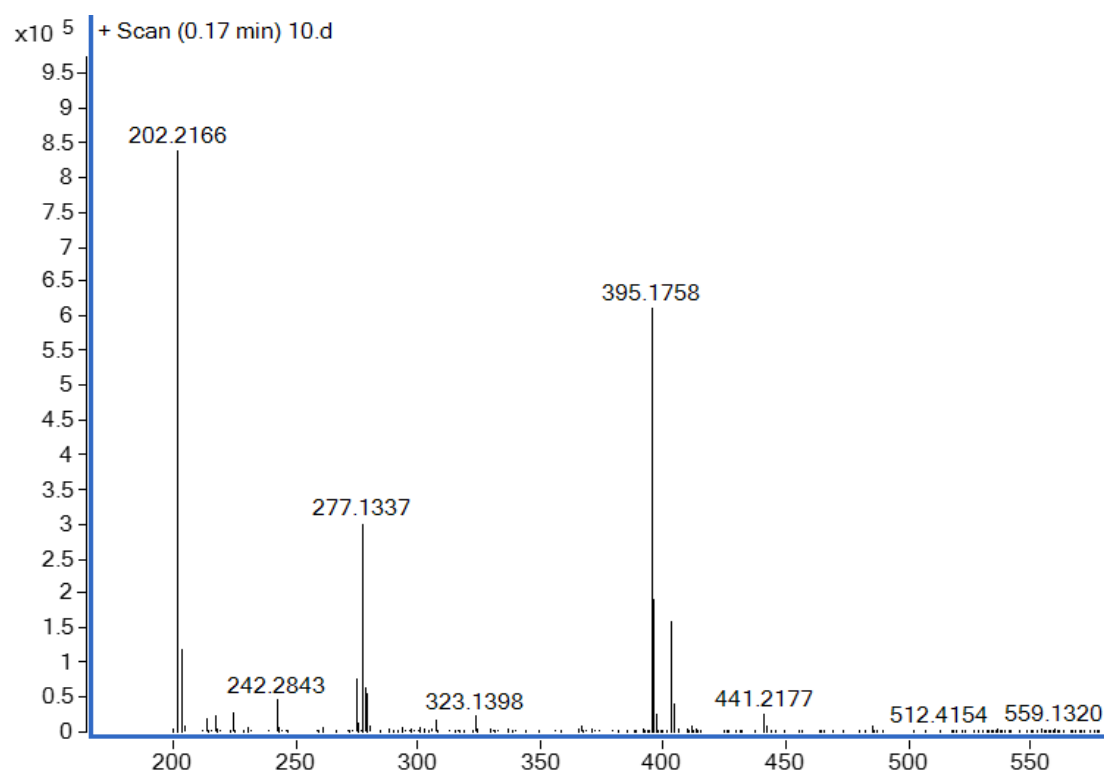

Figure S6 HRMS spectrum of compound 12b

# <sup>1</sup>H NMR of compound 12c

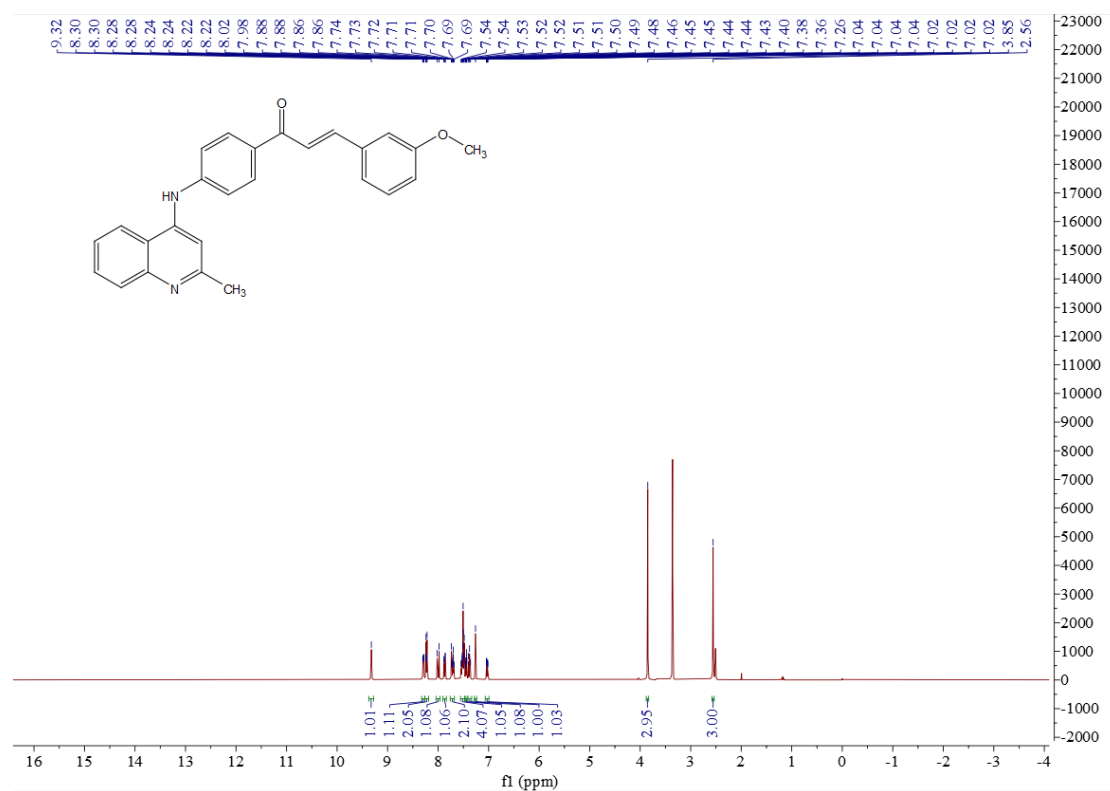

Figure S7 <sup>1</sup>H NMR spectrum of compound 12c

### $^{13}\text{C}$ NMR of compound 12c

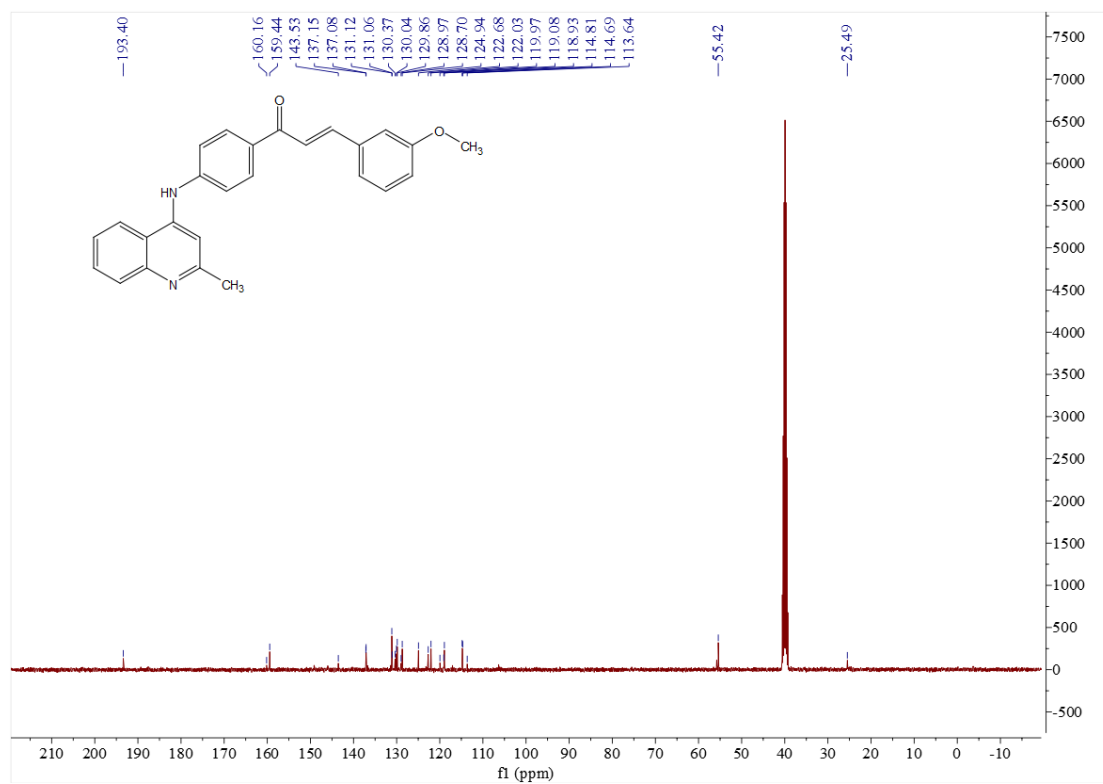

Figure S8  $^{13}\text{C}$  NMR spectrum of compound 12c

### HRMS spectrum of compound 12c

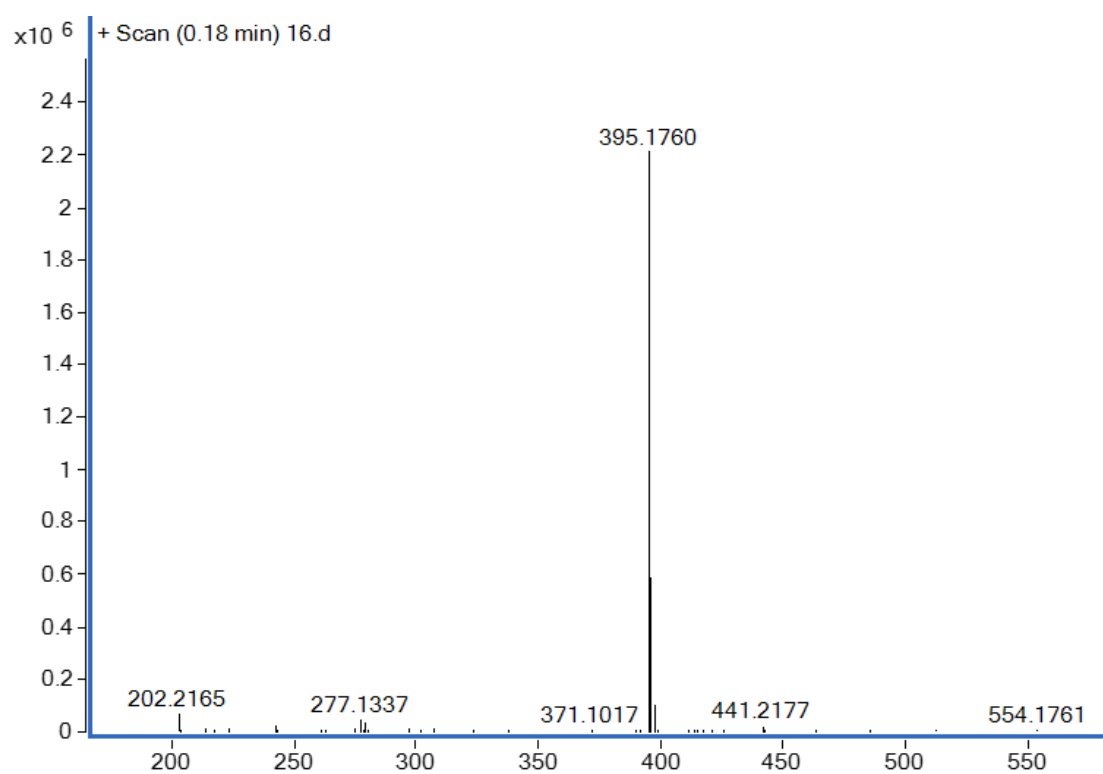

**Figure S9** HRMS spectrum of compound **12c**

# <sup>1</sup>H NMR of compound 12d

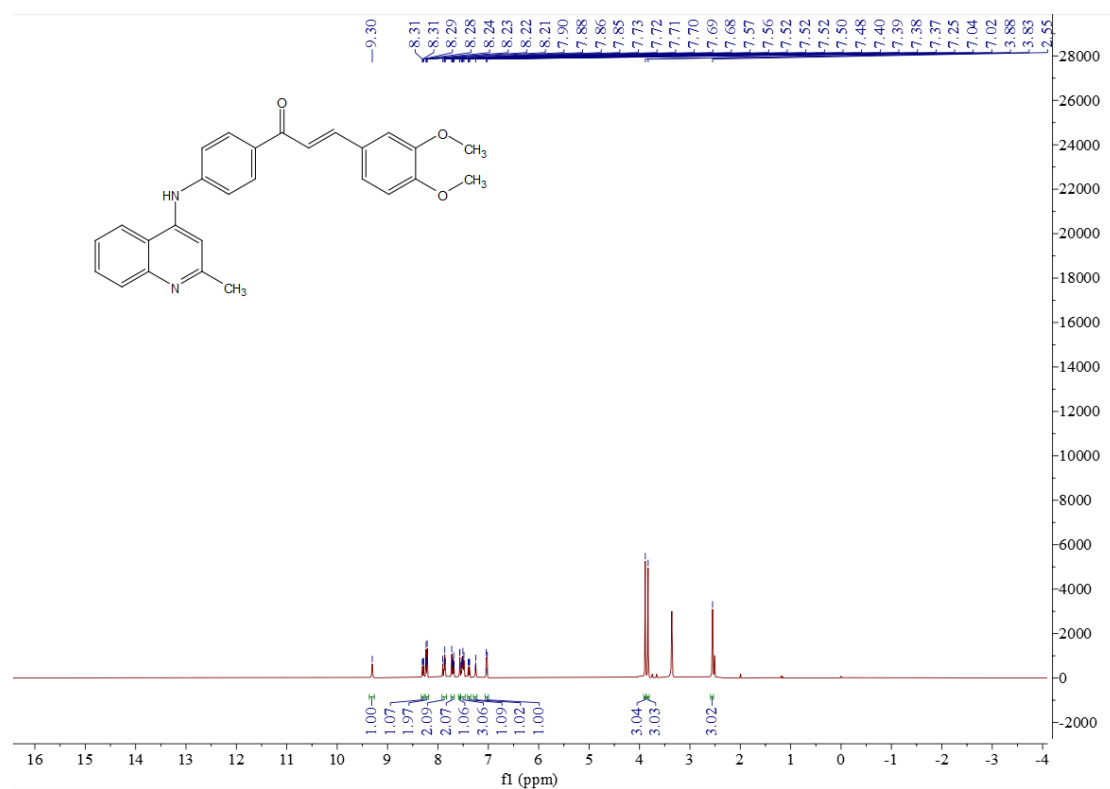

Figure S10 <sup>1</sup>H NMR spectrum of compound 12d

# <sup>13</sup>C NMR of compound 12d

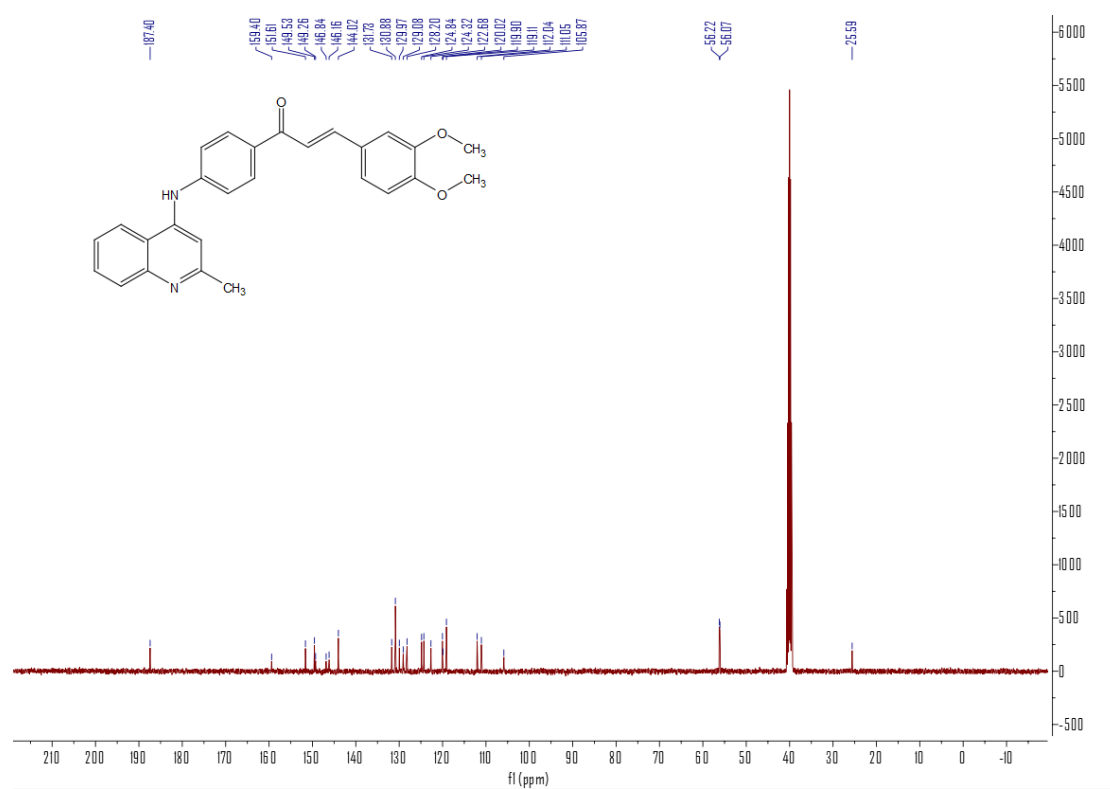

Figure S11 <sup>13</sup>C NMR spectrum of compound 12d

## HRMS spectrum of compound 12d

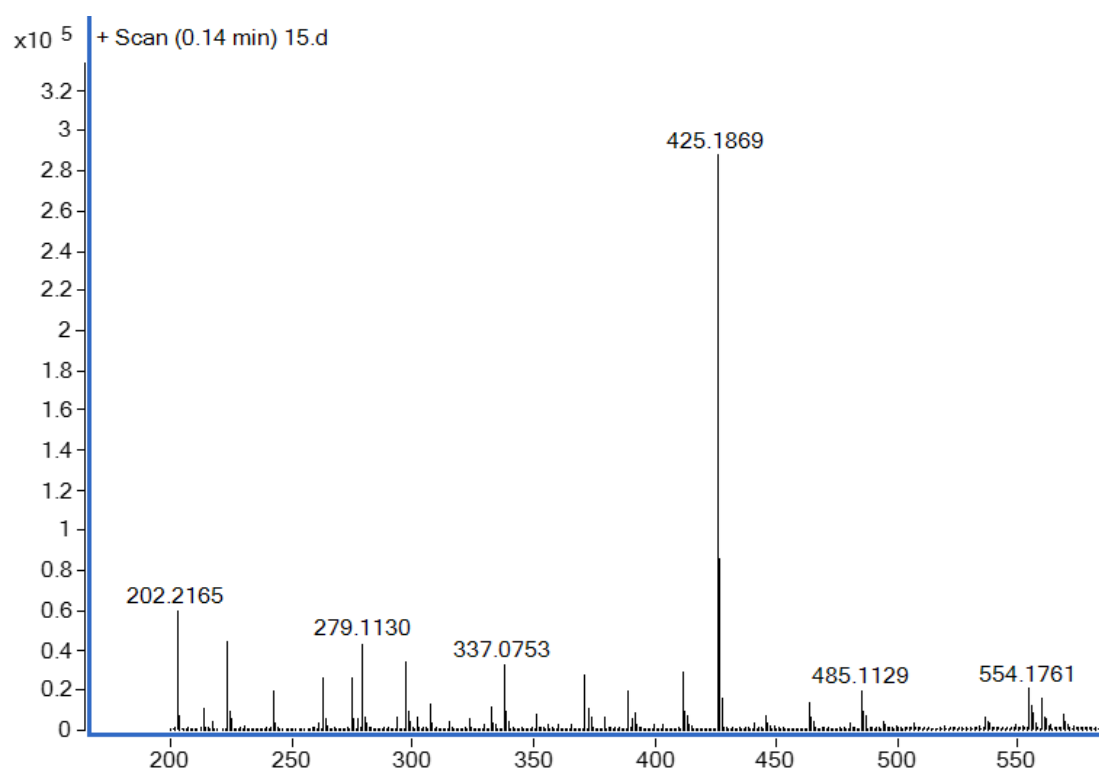

Figure S12 HRMS spectrum of compound 12d

# <sup>1</sup>H NMR of compound 12e

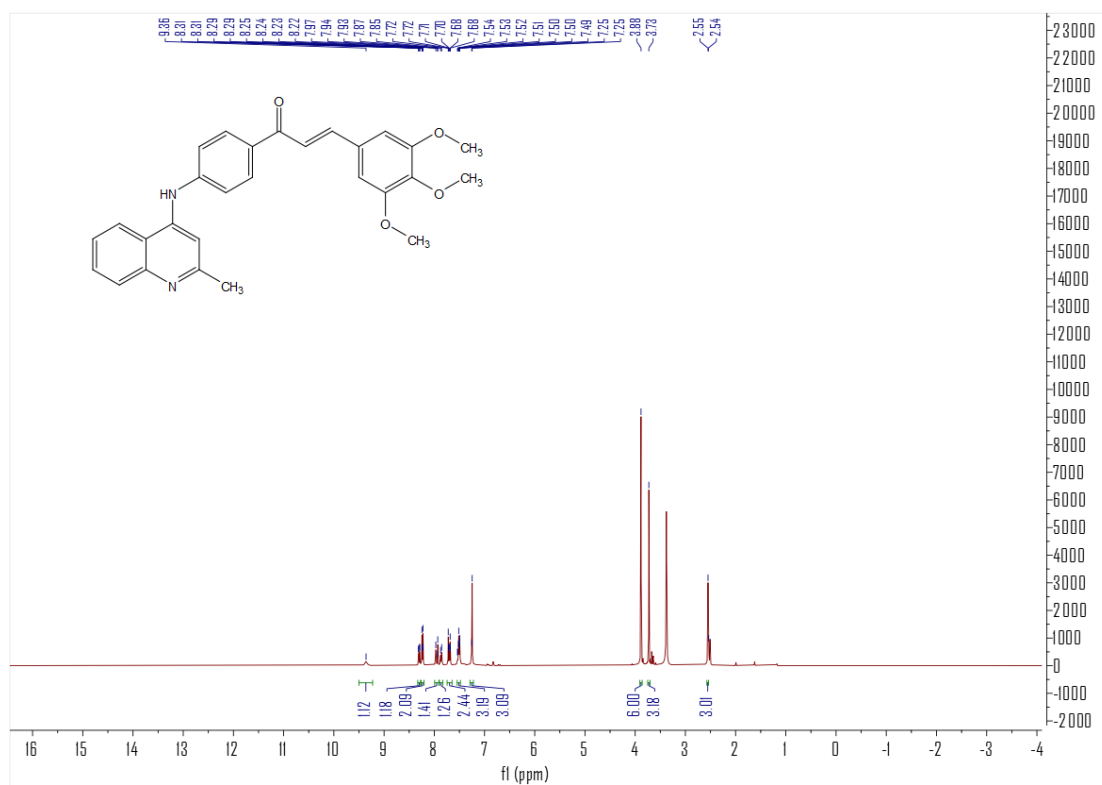

Figure S13 <sup>1</sup>H NMR spectrum of compound 12e

# <sup>13</sup>C NMR of compound 12e

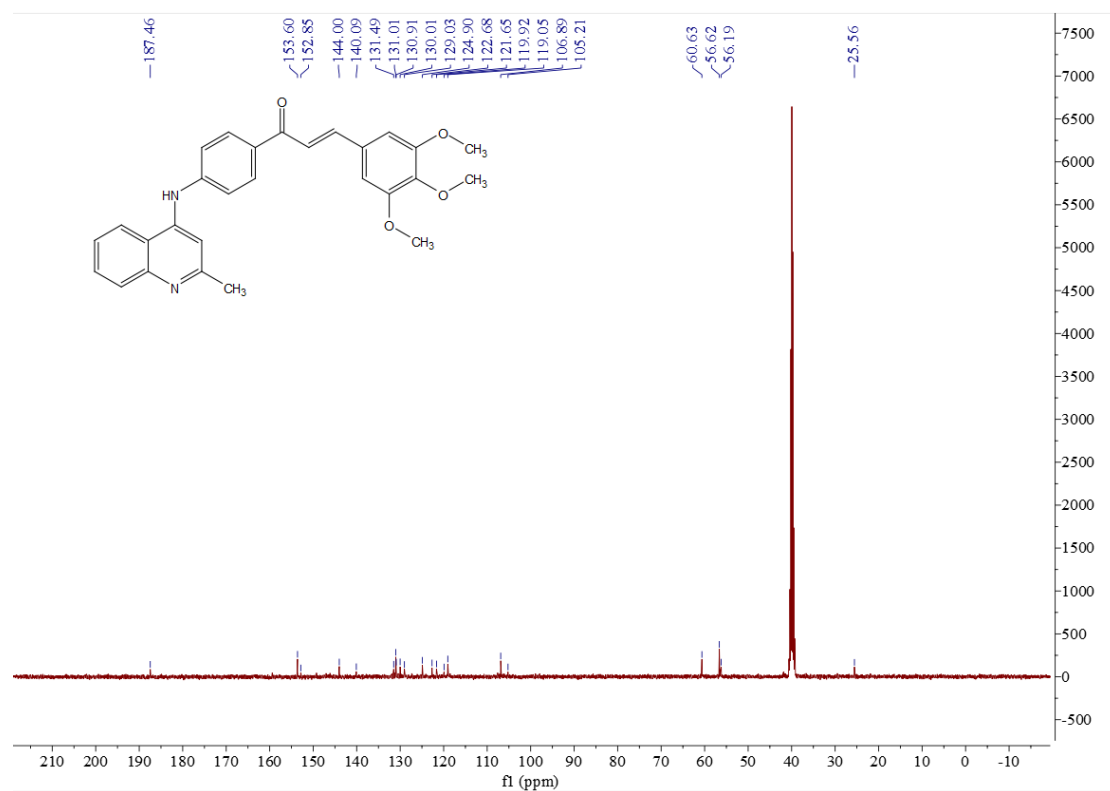

Figure S14 <sup>13</sup>C NMR spectrum of compound 12e

# HNMRS spectrum of compound 12e

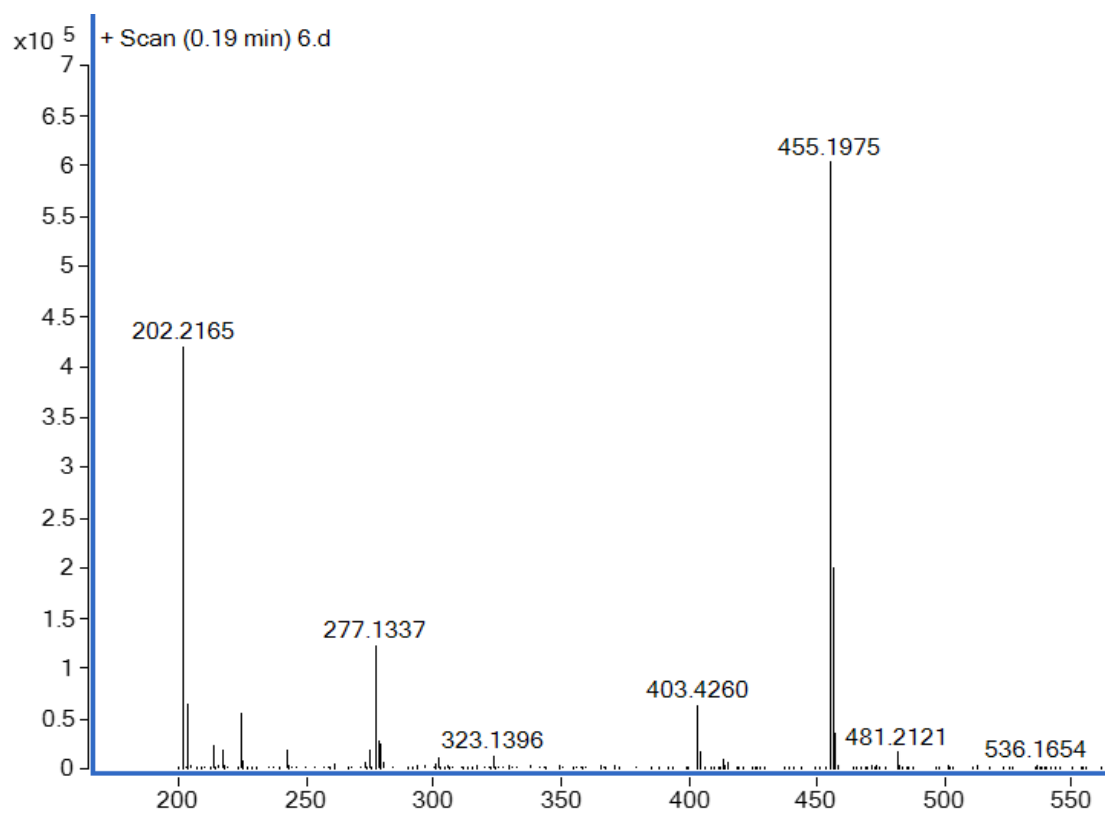

Figure S15 HRMS spectrum of compound 12e

# <sup>1</sup>H NMR of compound 12f

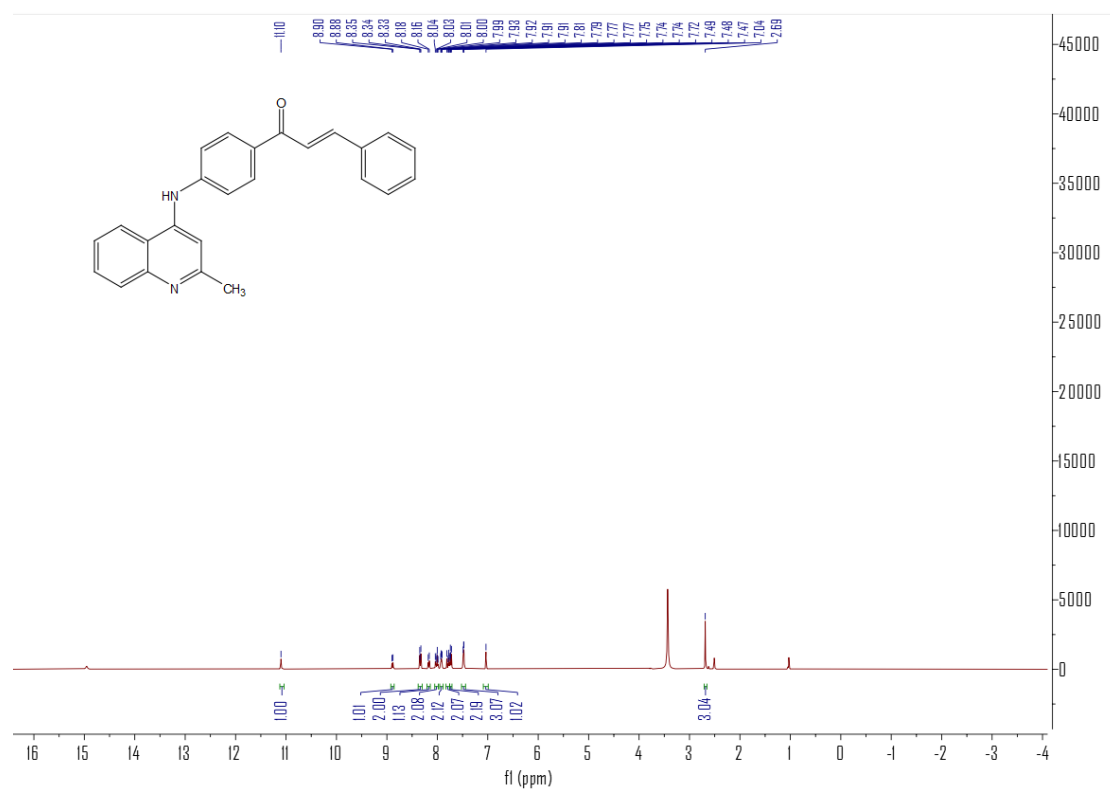

Figure S16 <sup>1</sup>H NMR spectrum of compound 12f

# <sup>13</sup>CNMR of compound 12f

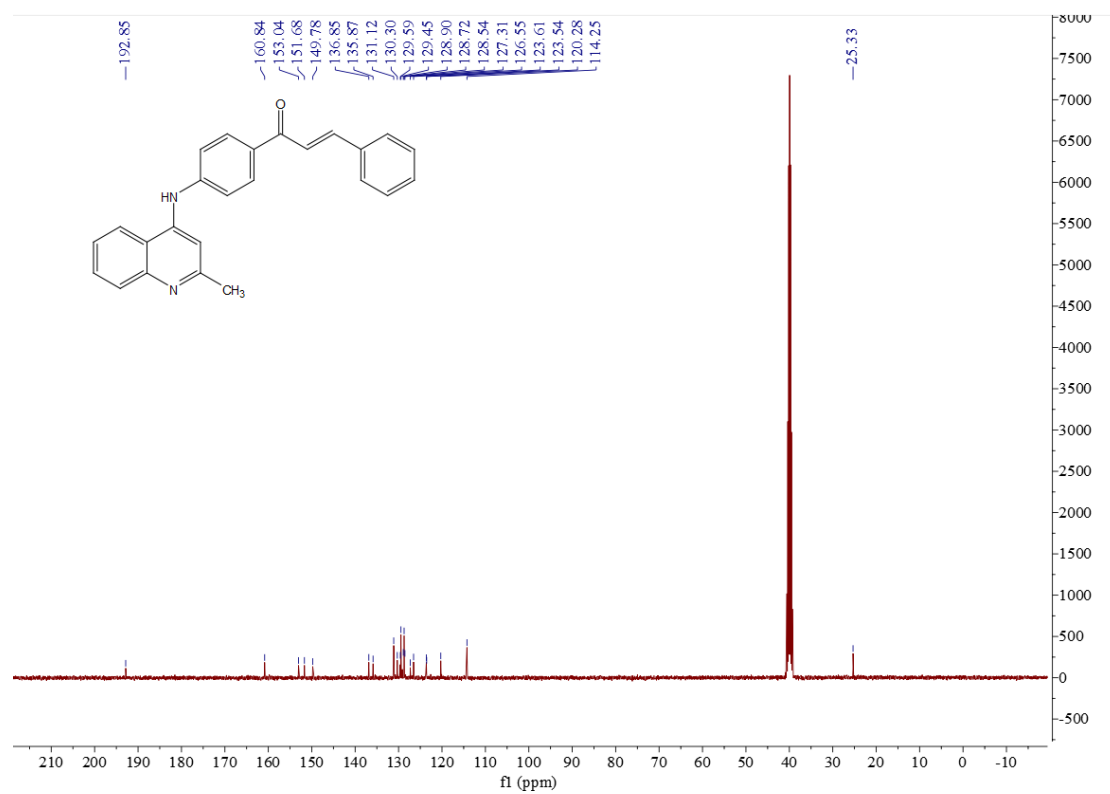

Figure S17 <sup>13</sup>C NMR spectrum of compound 12f

# HRMS spectrum of compound 12f

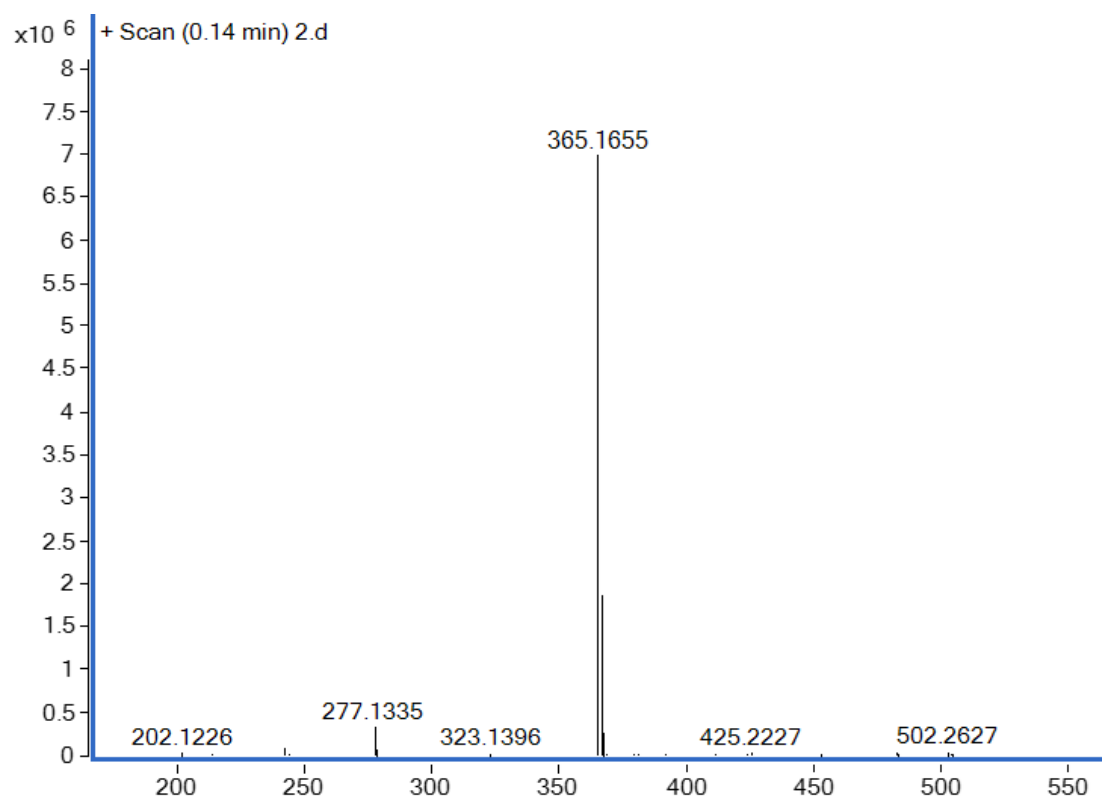

Figure S18 HRMS spectrum of compound 12f

# <sup>1</sup>H NMR of compound 12g

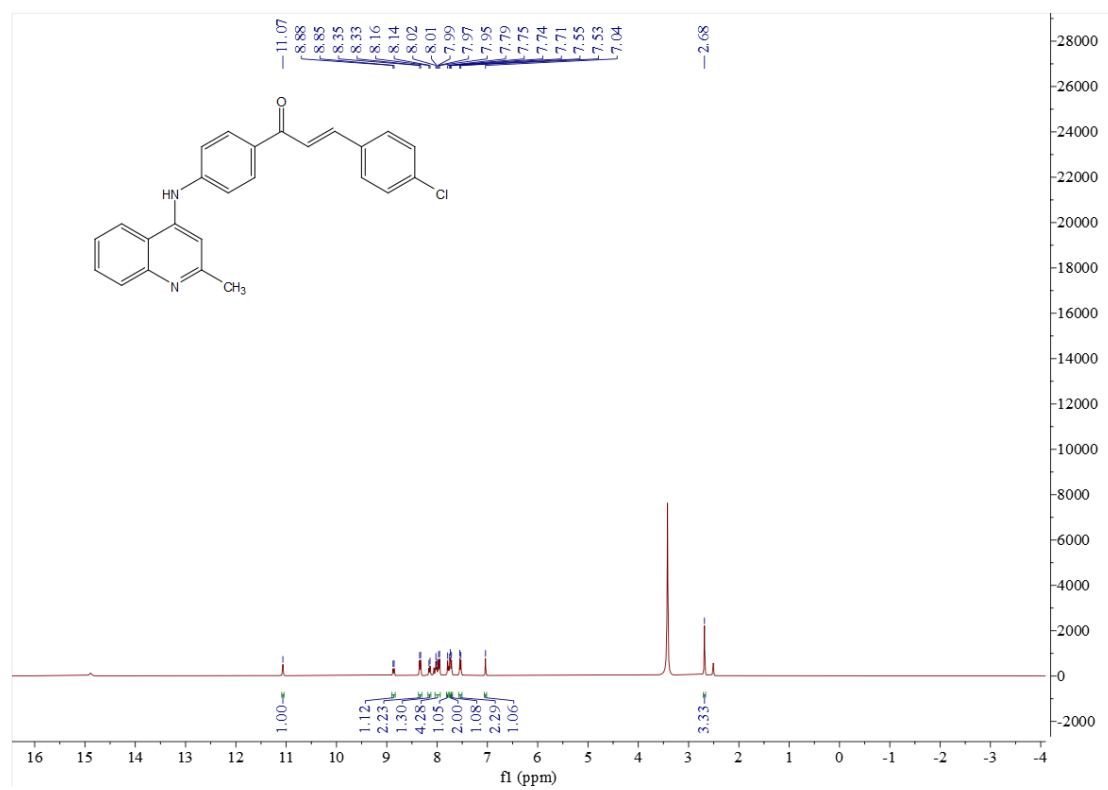

Figure S19 <sup>1</sup>H NMR spectrum of compound 12g

# <sup>13</sup>C NMR of compound 12g

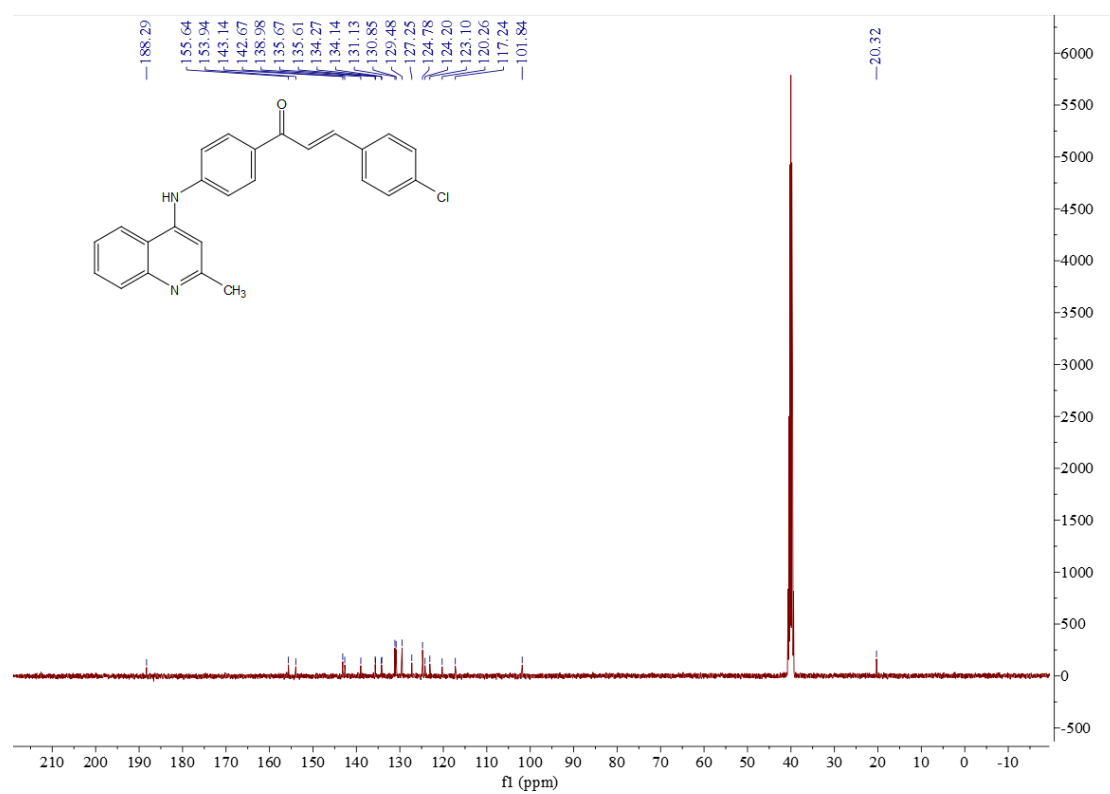

Figure S20 <sup>13</sup>C NMR spectrum of compound 12g

## HRMS spectrum of compound 12g

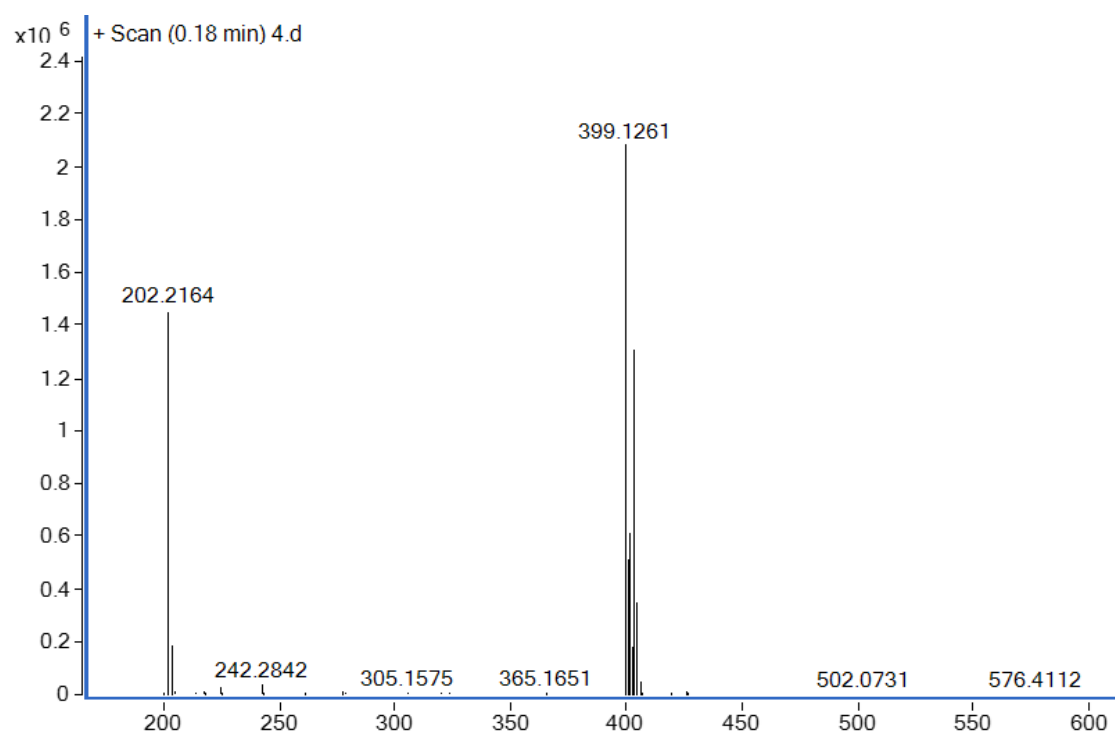

**Figure S21** HRMS spectrum of compound **12g**

# <sup>1</sup>H NMR of compound 12h

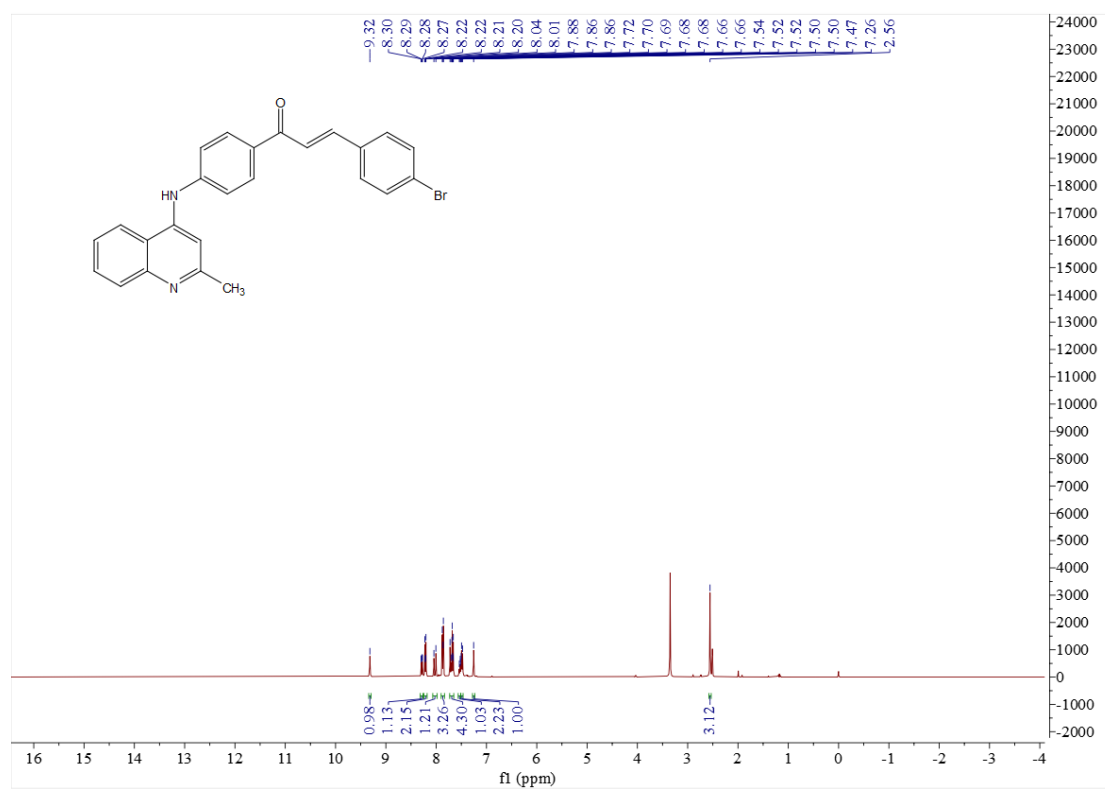

Figure S22 <sup>1</sup>H NMR spectrum of compound 12h

# <sup>13</sup>C NMR of compound 12h

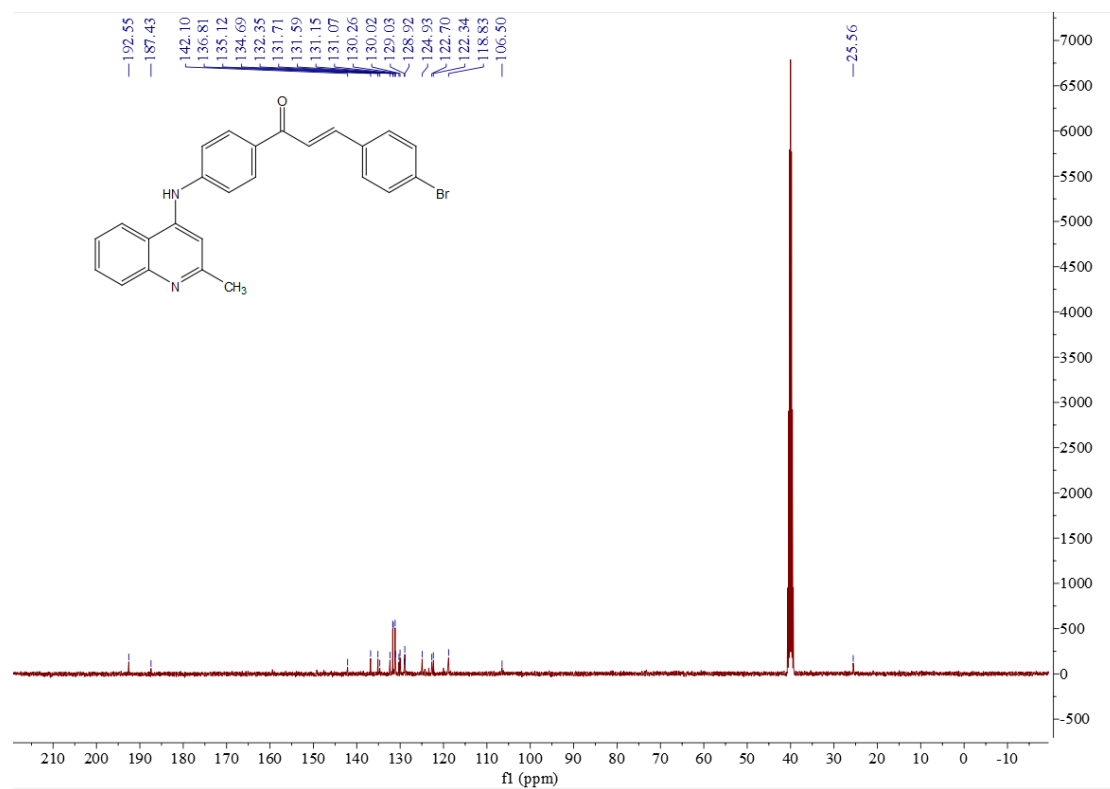

Figure S23 <sup>13</sup>C NMR spectrum of compound 12h

## HRMS spectrum of compound 12h

Scan (m/z) 1200.0

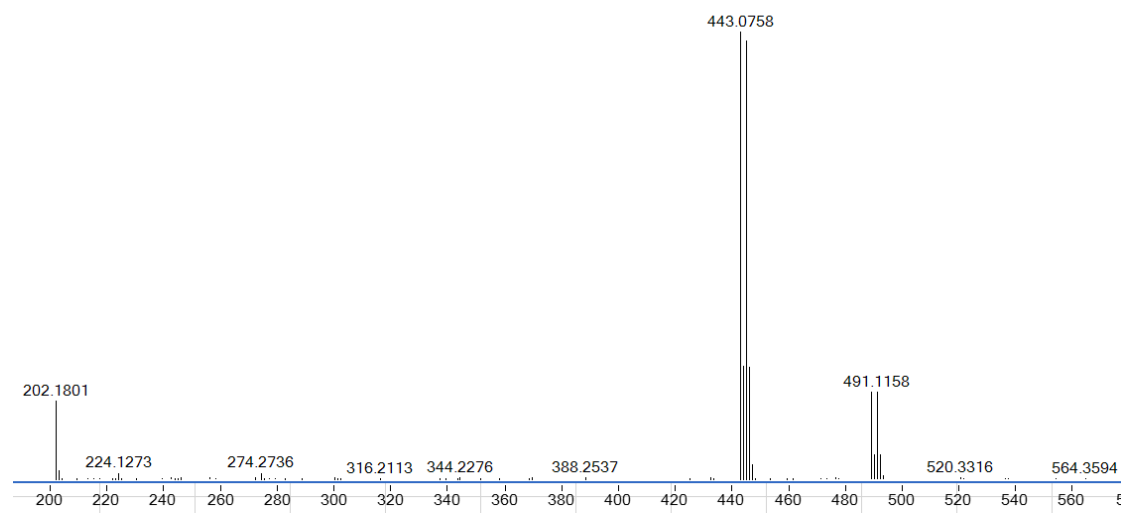

**Figure S24** HRMS spectrum of compound **12h**

# <sup>1</sup>H NMR of compound 12i

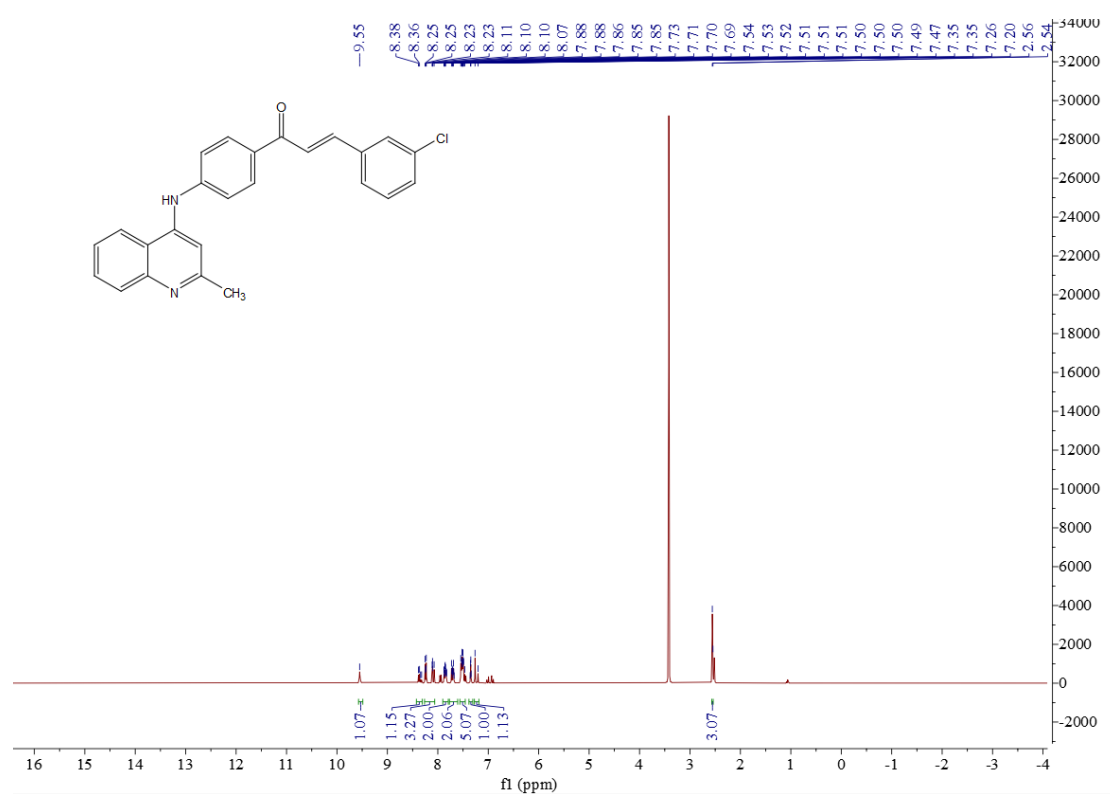

Figure S25 <sup>1</sup>H NMR spectrum of compound 12i

# <sup>13</sup>C NMR of compound 12i

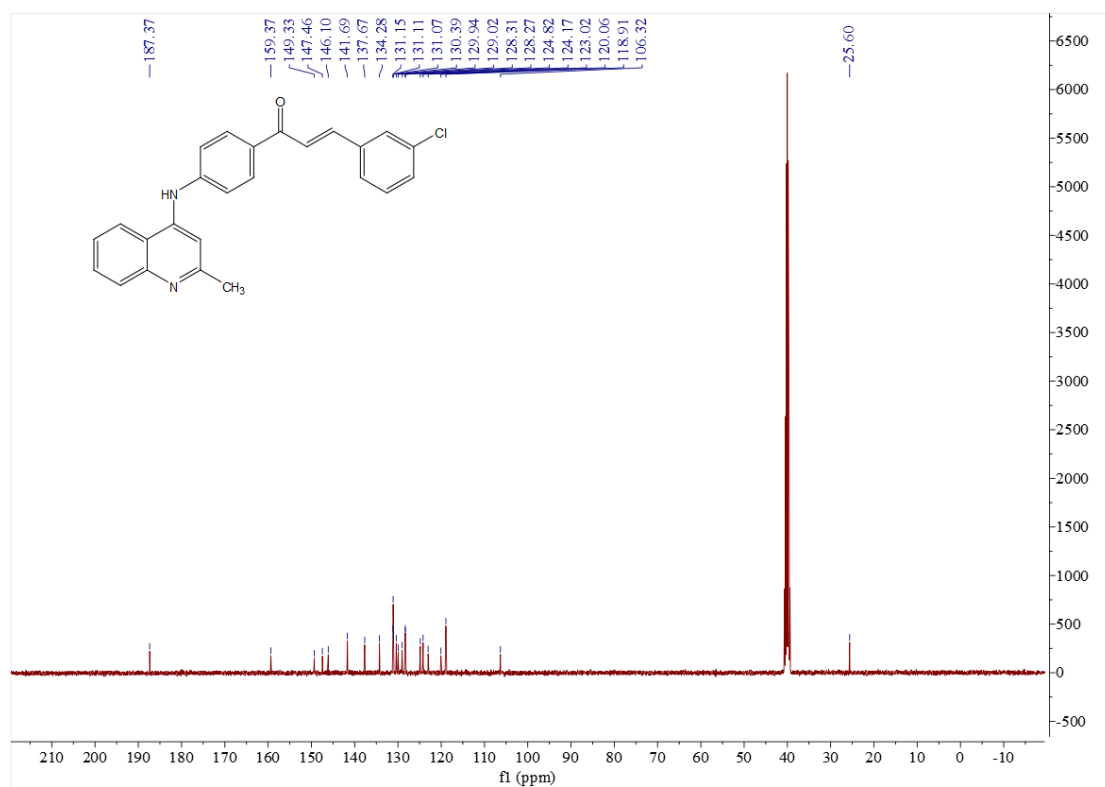

Figure S26 <sup>13</sup>C NMR spectrum of compound 12i

# HRMS spectrum of compound 12i

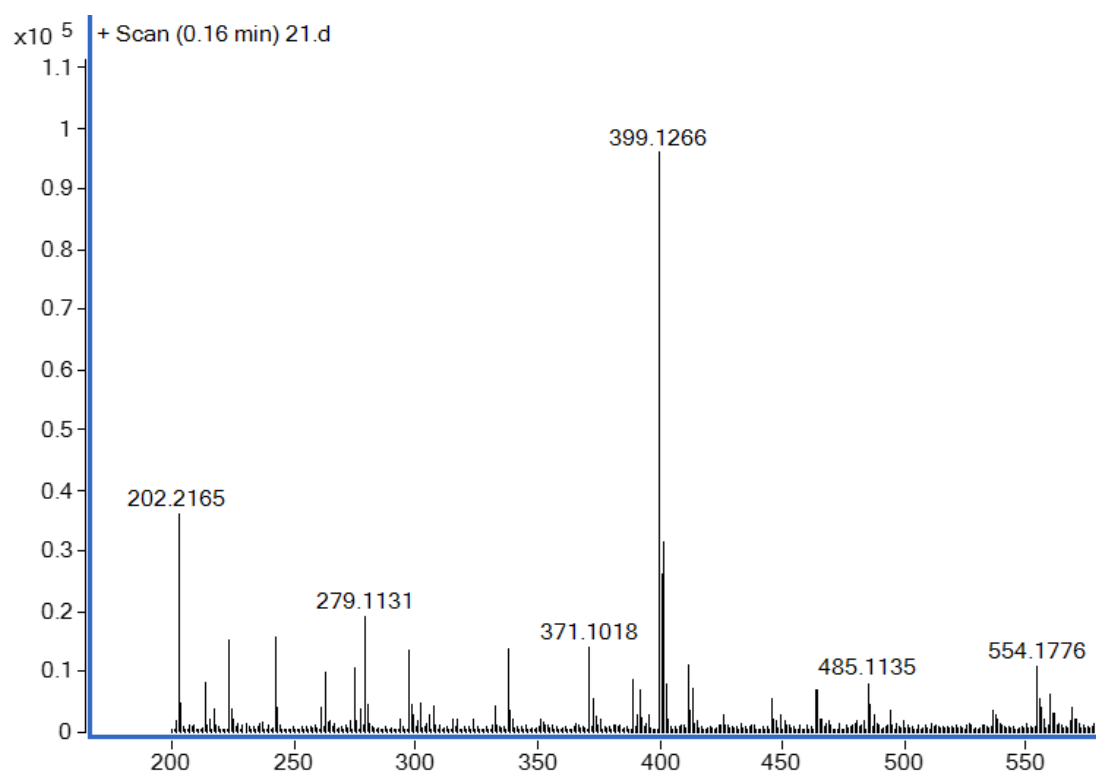

Figure S27 HRMS spectrum of compound 12i

# <sup>1</sup>H NMR of compound 12j

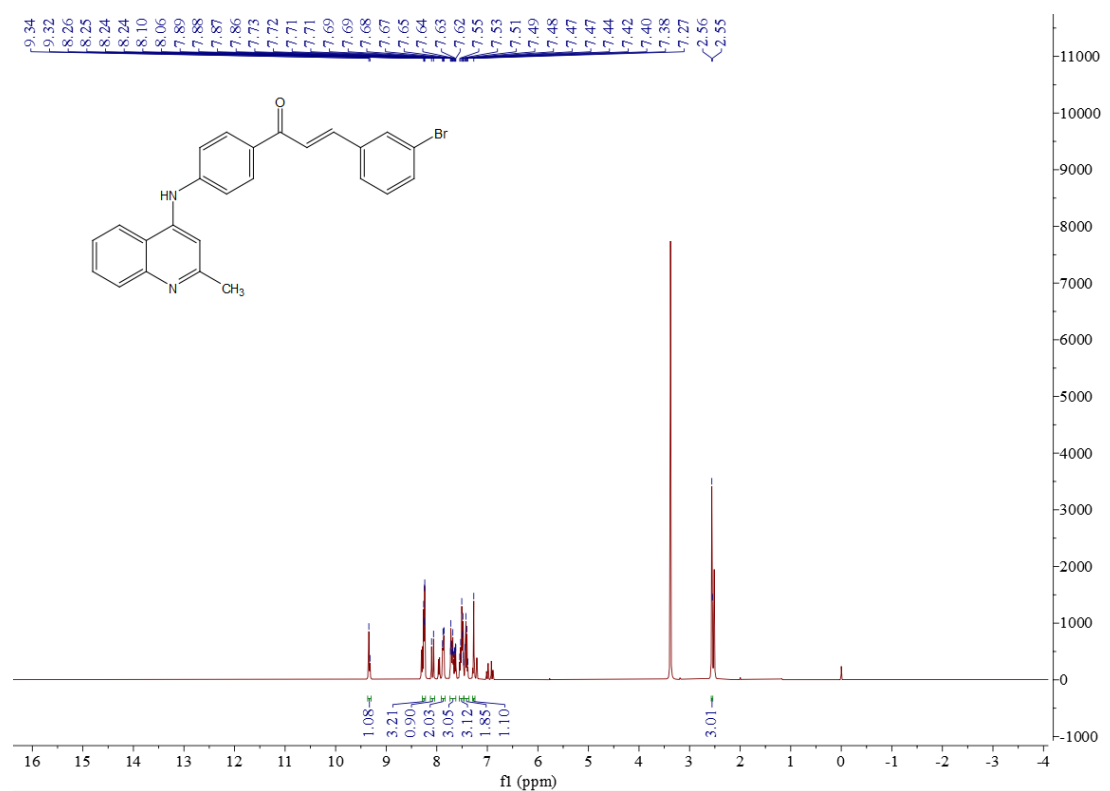

Figure S28 <sup>1</sup>H NMR spectrum of compound 12j

# <sup>13</sup>C NMR of compound 12j

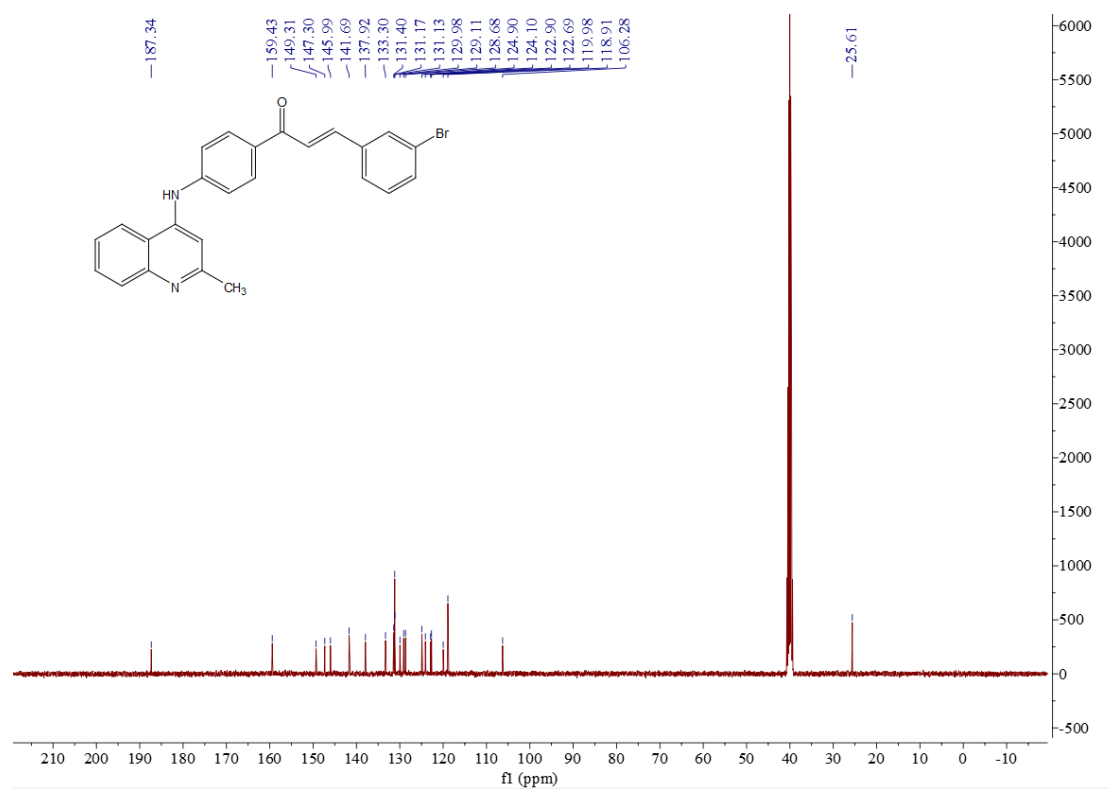

Figure S29 <sup>13</sup>C NMR spectrum of compound 12j

### HRMS spectrum of compound 12j

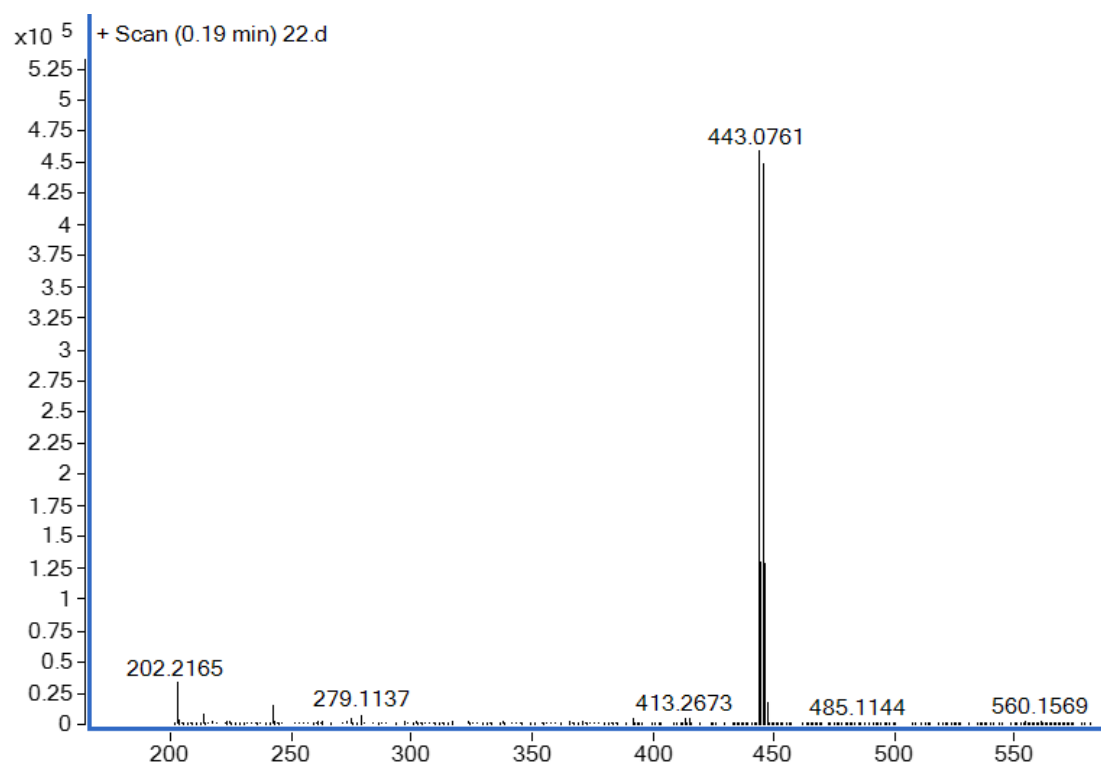

Figure S30 HRMS spectrum of compound 12j

# <sup>1</sup>H NMR of compound 13a

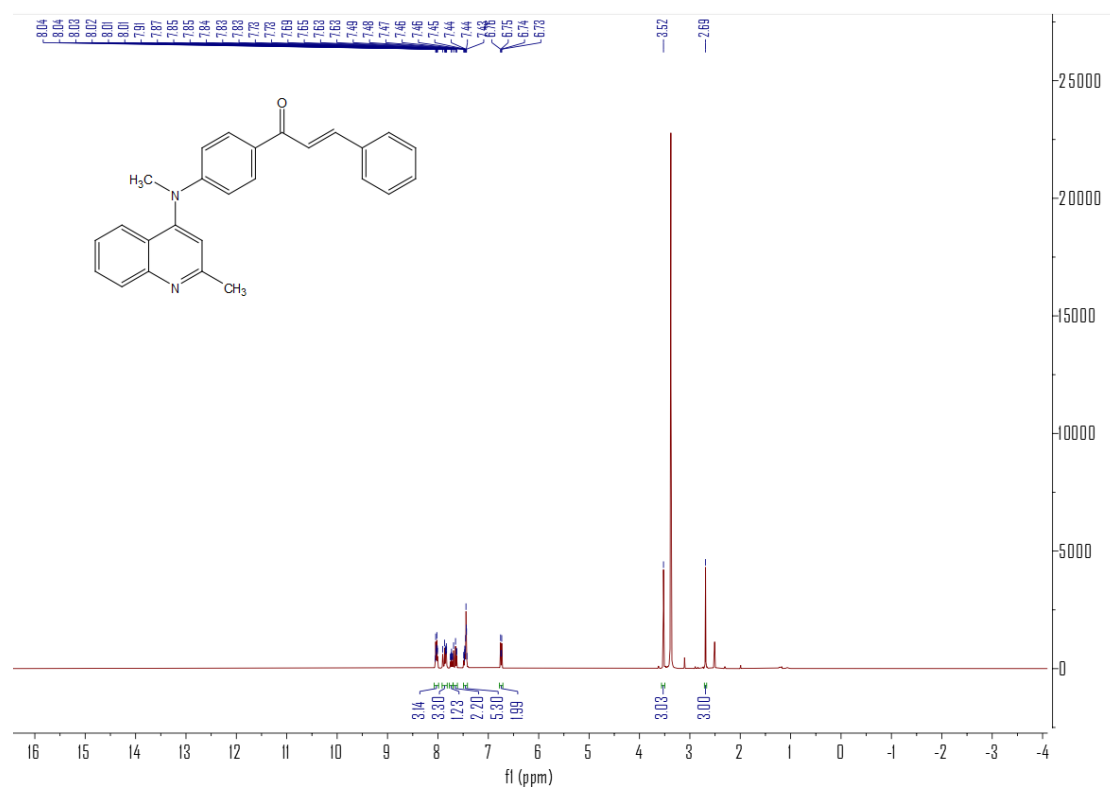

Figure S31 <sup>1</sup>H NMR spectrum of compound 13a

### $^{13}\text{C}$ NMR of compound 13a

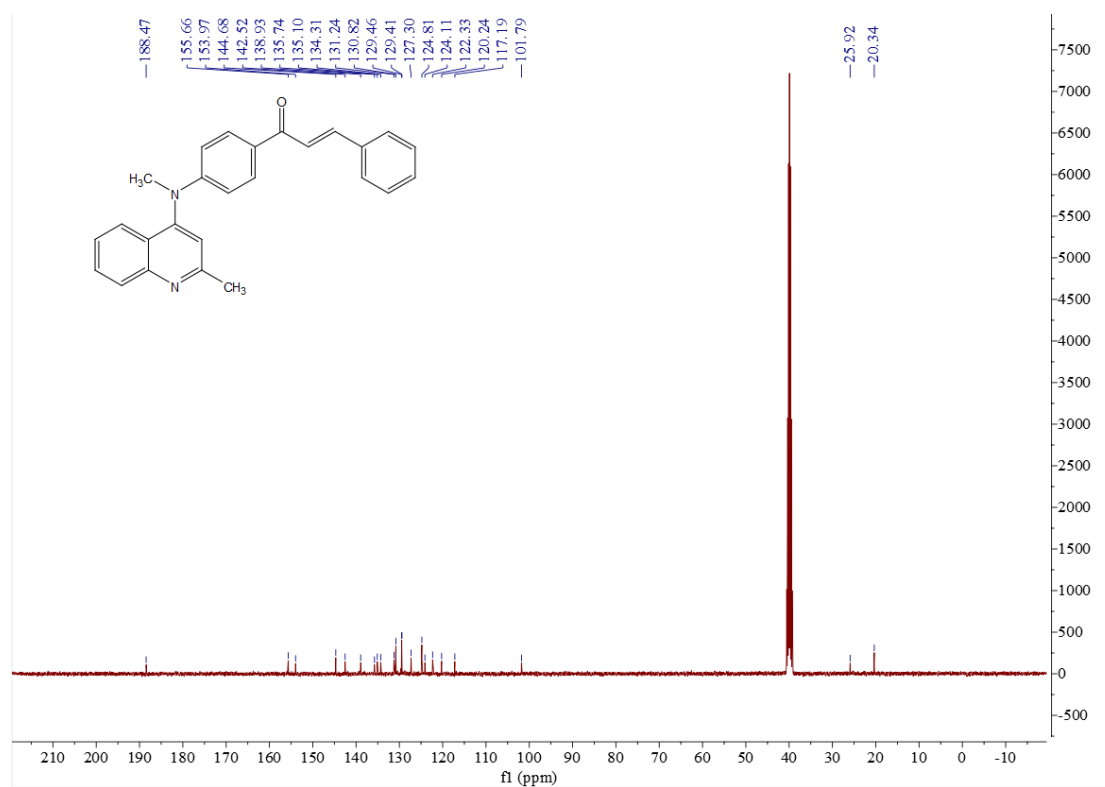

Figure S32  $^{13}\text{C}$  NMR spectrum of compound 13a

### HRMS spectrum of compound 13a

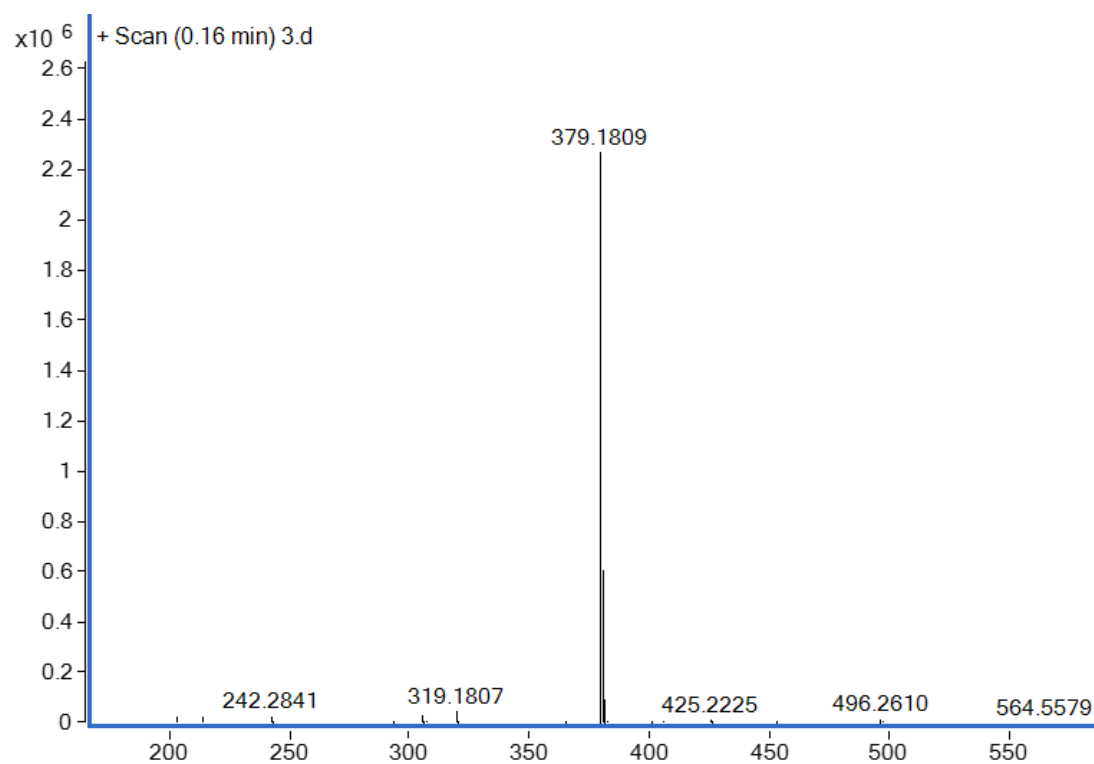

Figure S33 HRMS spectrum of compound 13a

# <sup>1</sup>H NMR of compound 13b

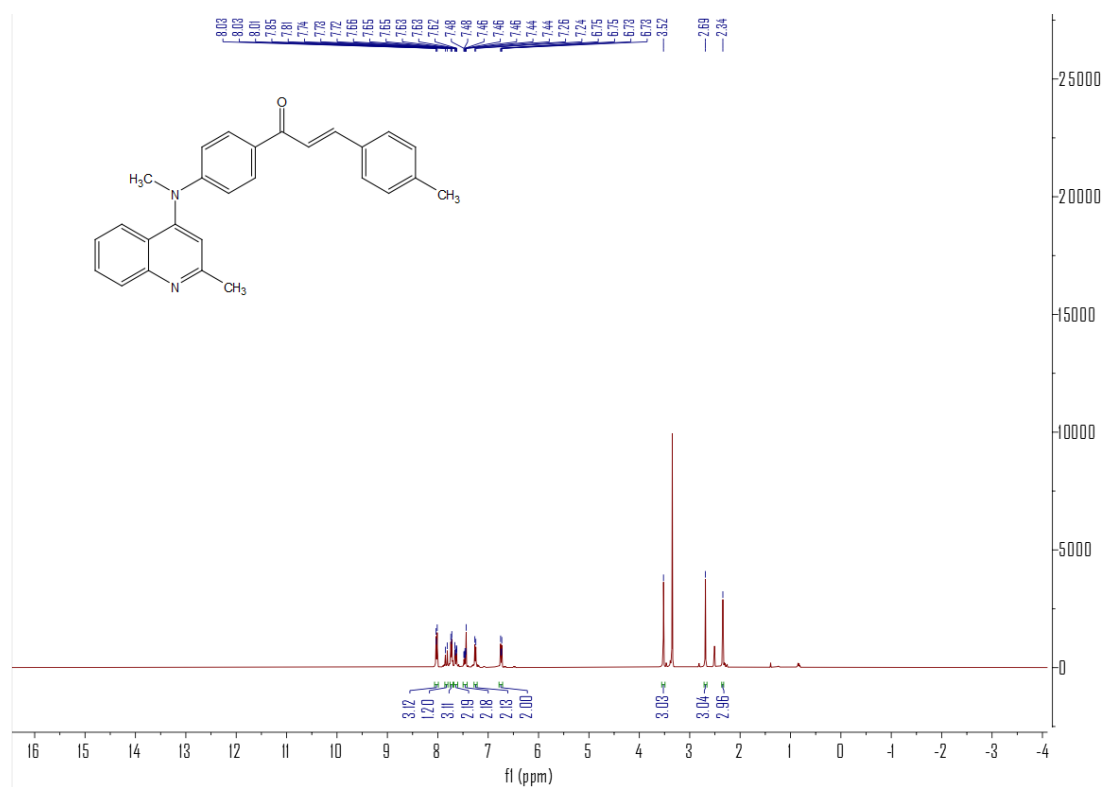

Figure S34 <sup>1</sup>H NMR spectrum of compound 13b

# <sup>13</sup>C NMR of compound 13b

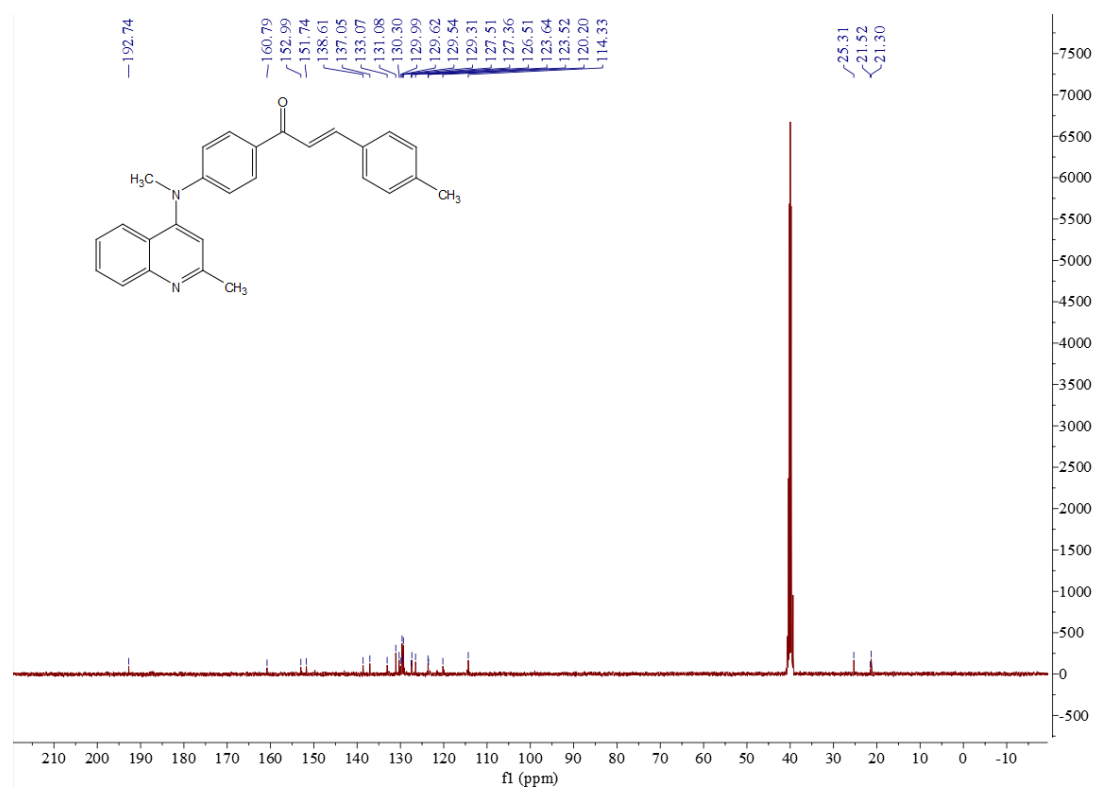

Figure S35 <sup>13</sup>C NMR spectrum of compound 13b

### HRMS spectrum of compound 13b

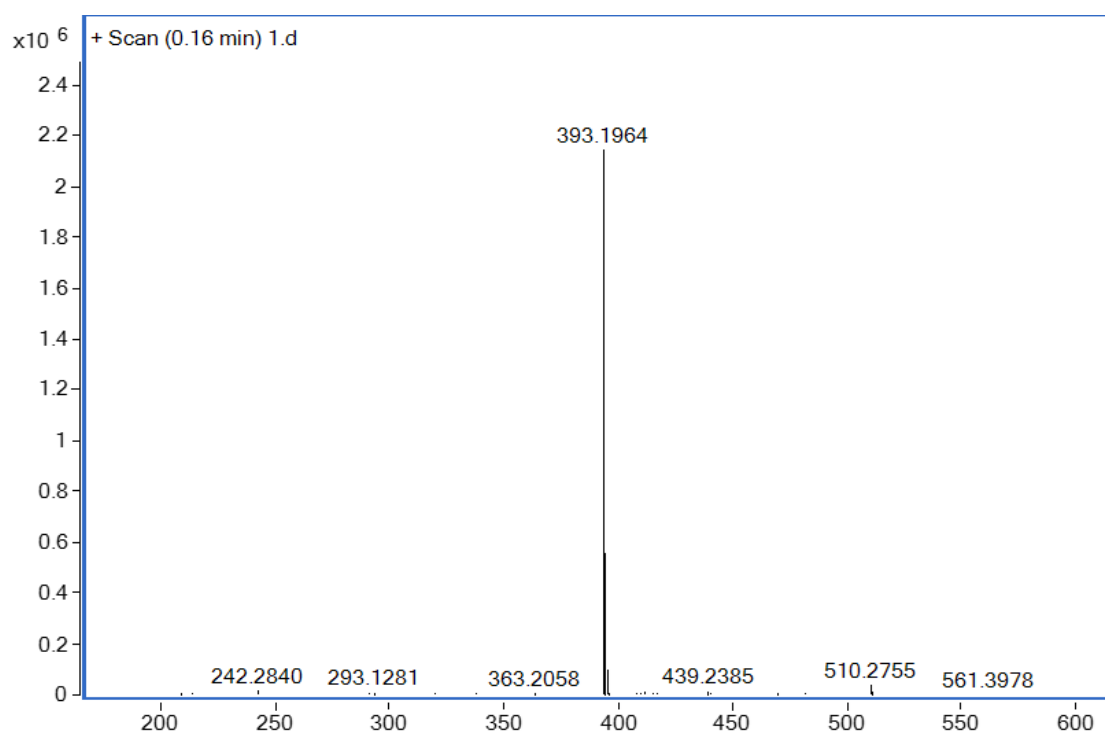

Figure S36 HRMS spectrum of compound 13b

# <sup>1</sup>H NMR of compound 13c

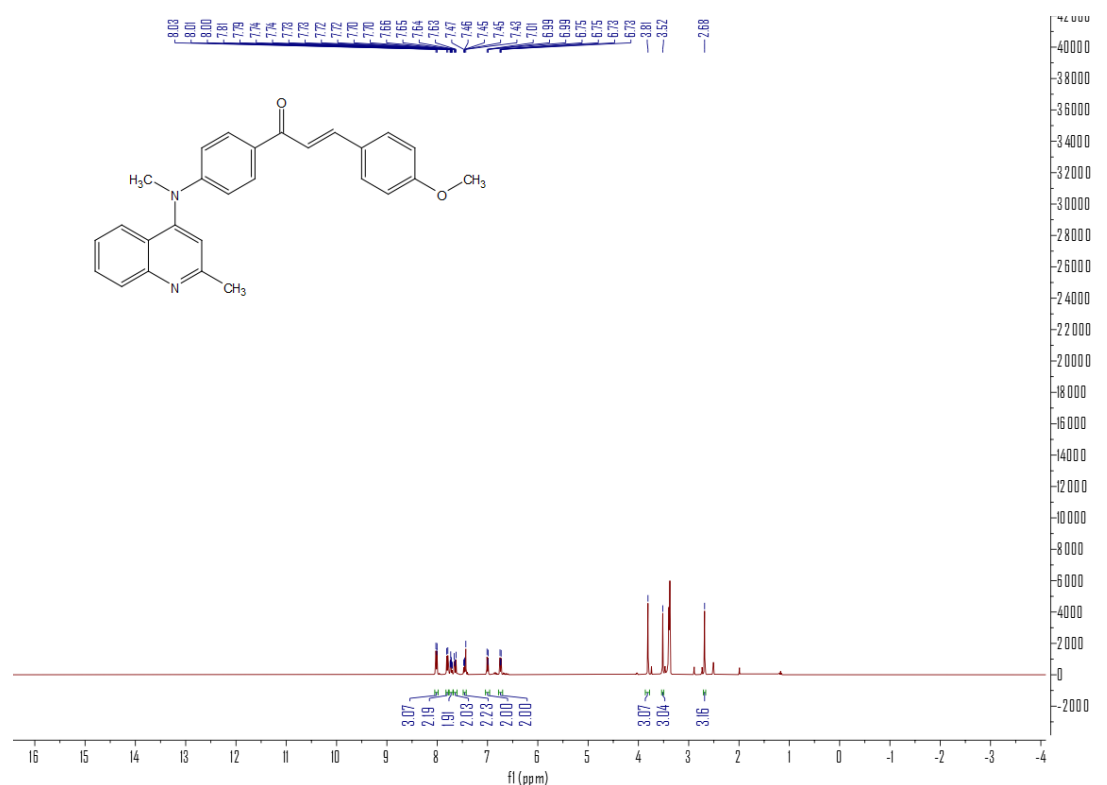

Figure S37 <sup>1</sup>H NMR spectrum of compound 13c

# <sup>13</sup>C NMR of compound 13c

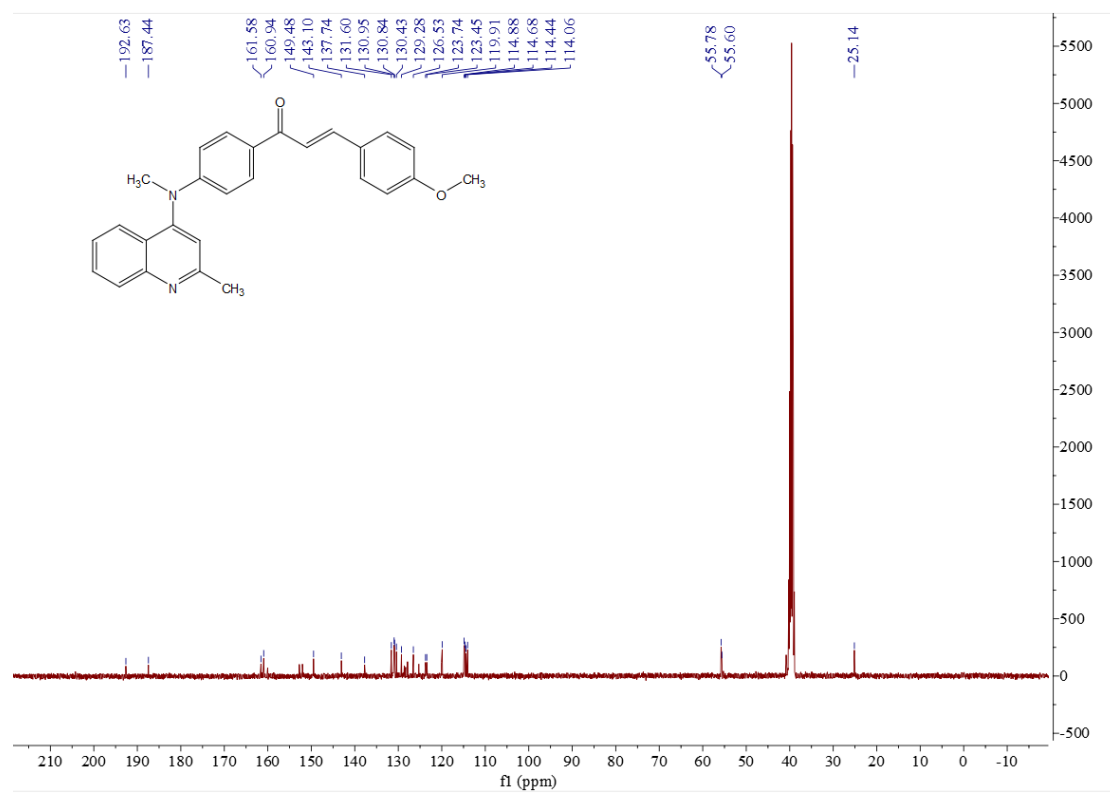

Figure S38 <sup>13</sup>C NMR spectrum of compound 13c

# HRMS spectrum of compound 13c

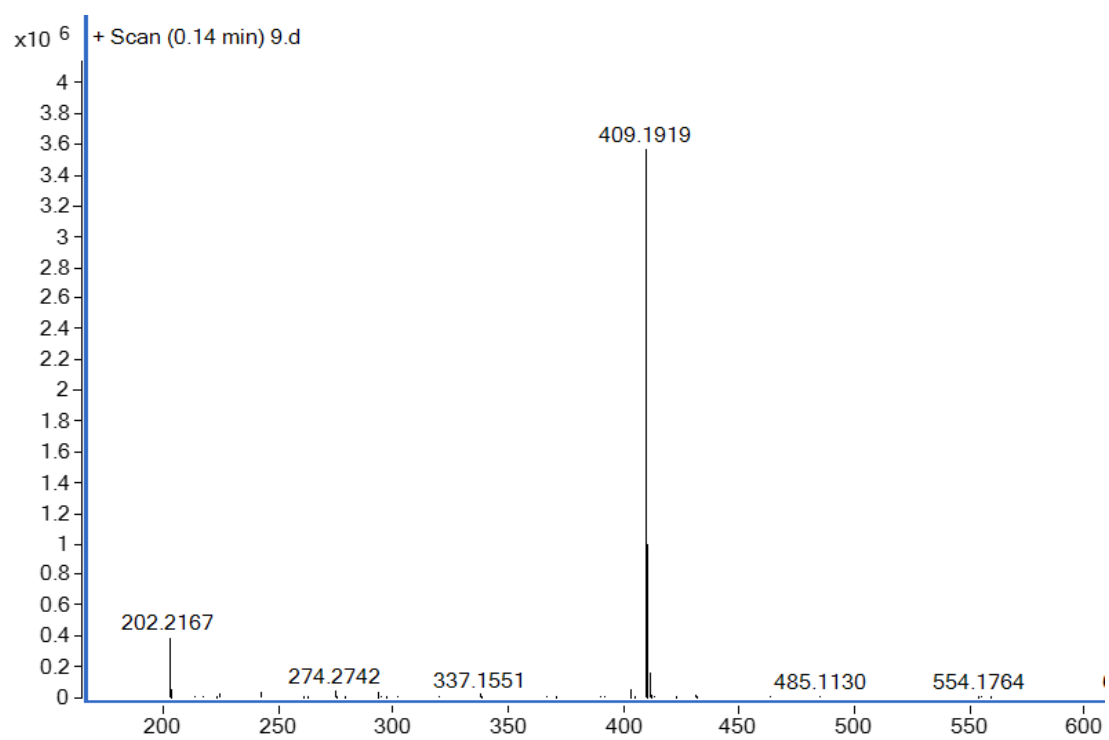

Figure S39 HRMS spectrum of compound 13c

# <sup>1</sup>H NMR of compound 13d

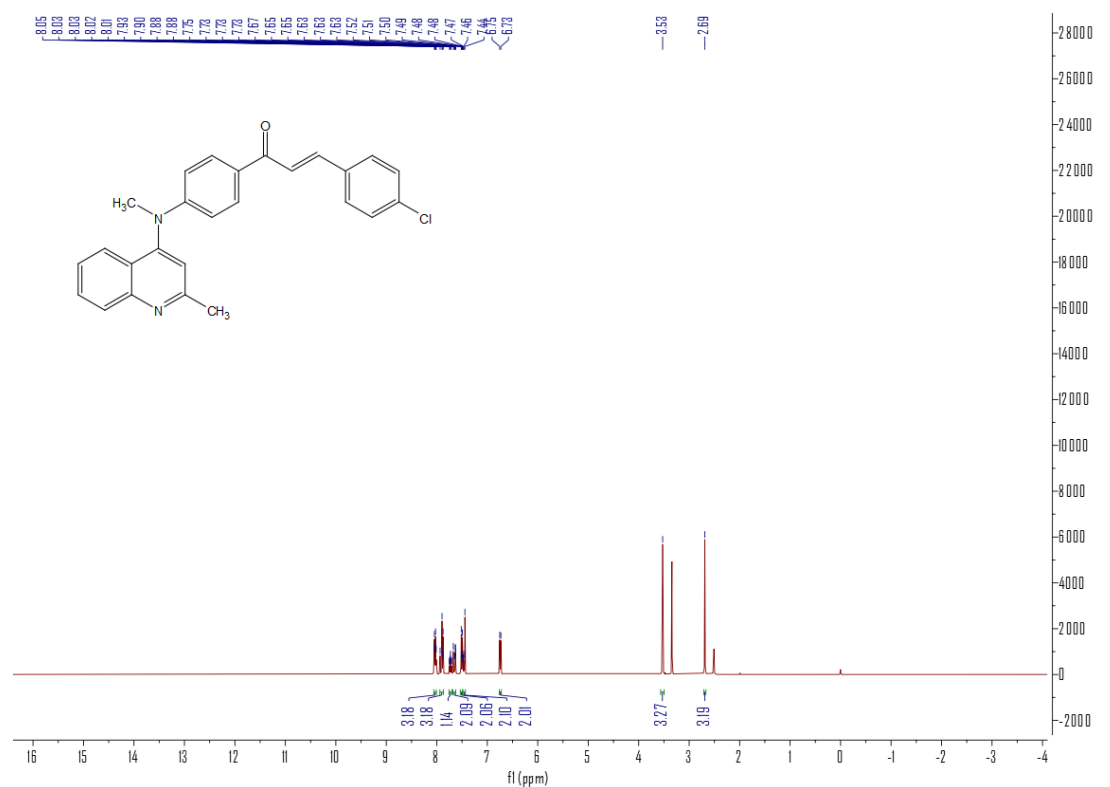

Figure S40 <sup>1</sup>H NMR spectrum of compound 13d

### <sup>13</sup>C NMR of compound 13d

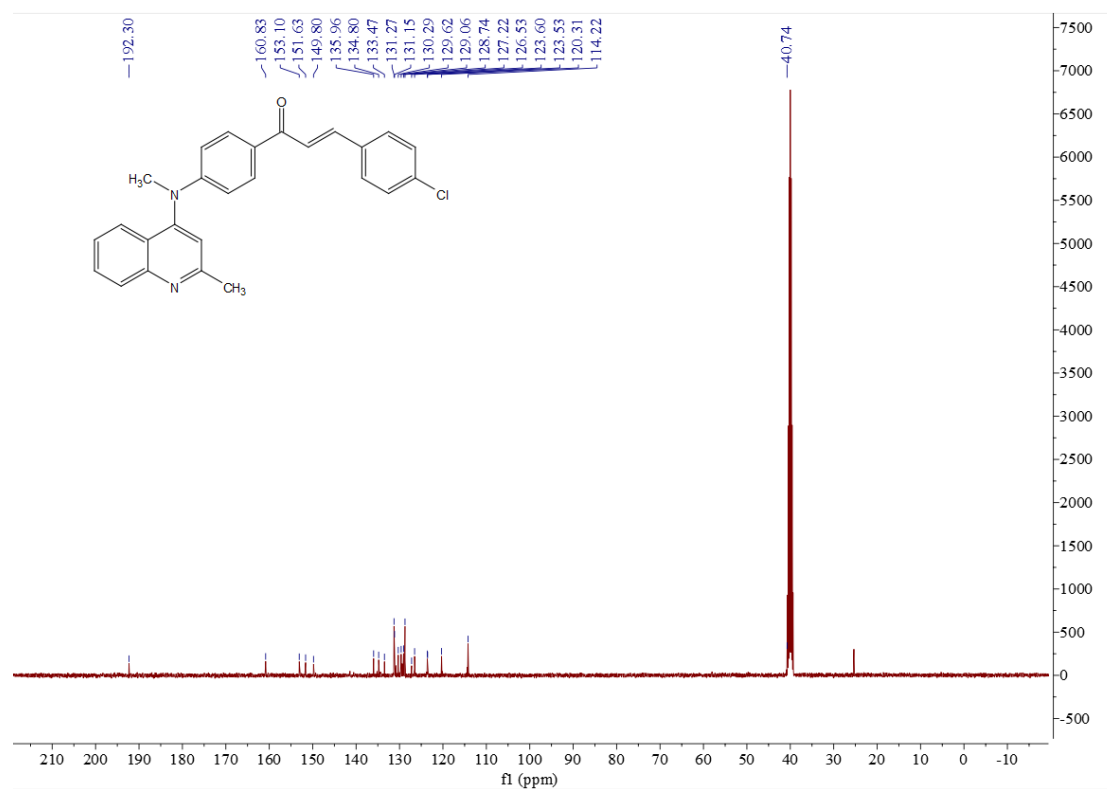

Figure S41 <sup>13</sup>C NMR spectrum of compound 13d

# HRMS spectrum of compound 13d

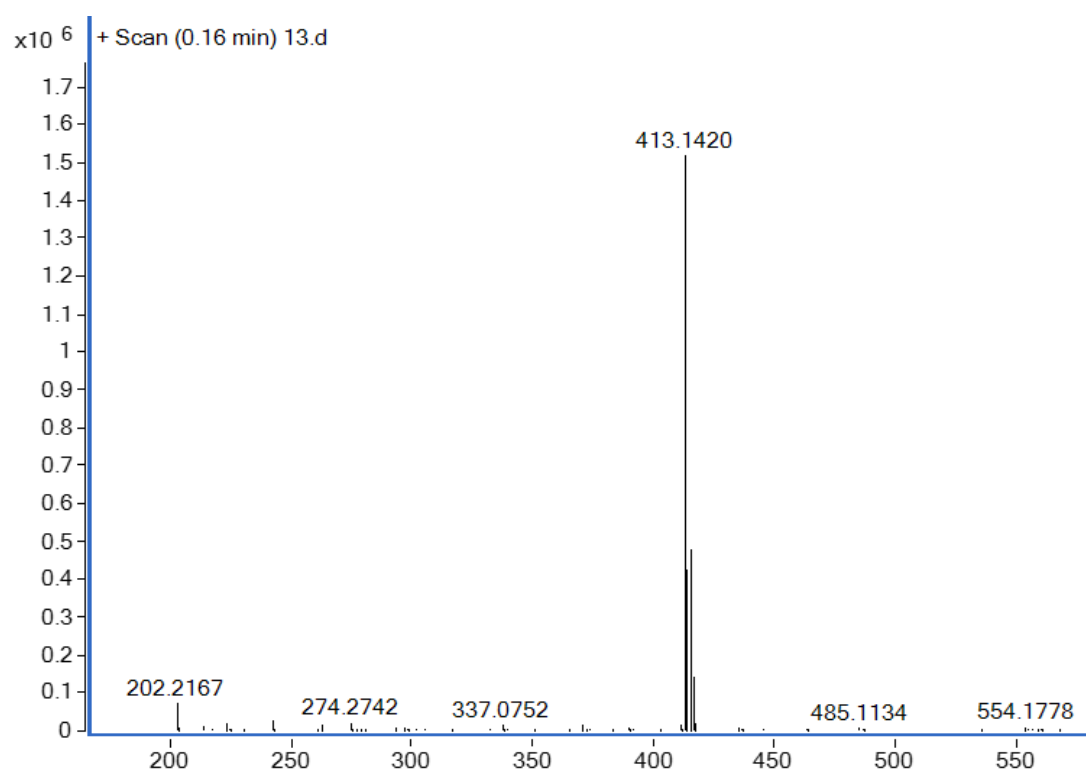

Figure S42 HRMS spectrum of compound 13d

# <sup>1</sup>H NMR of compound 13e

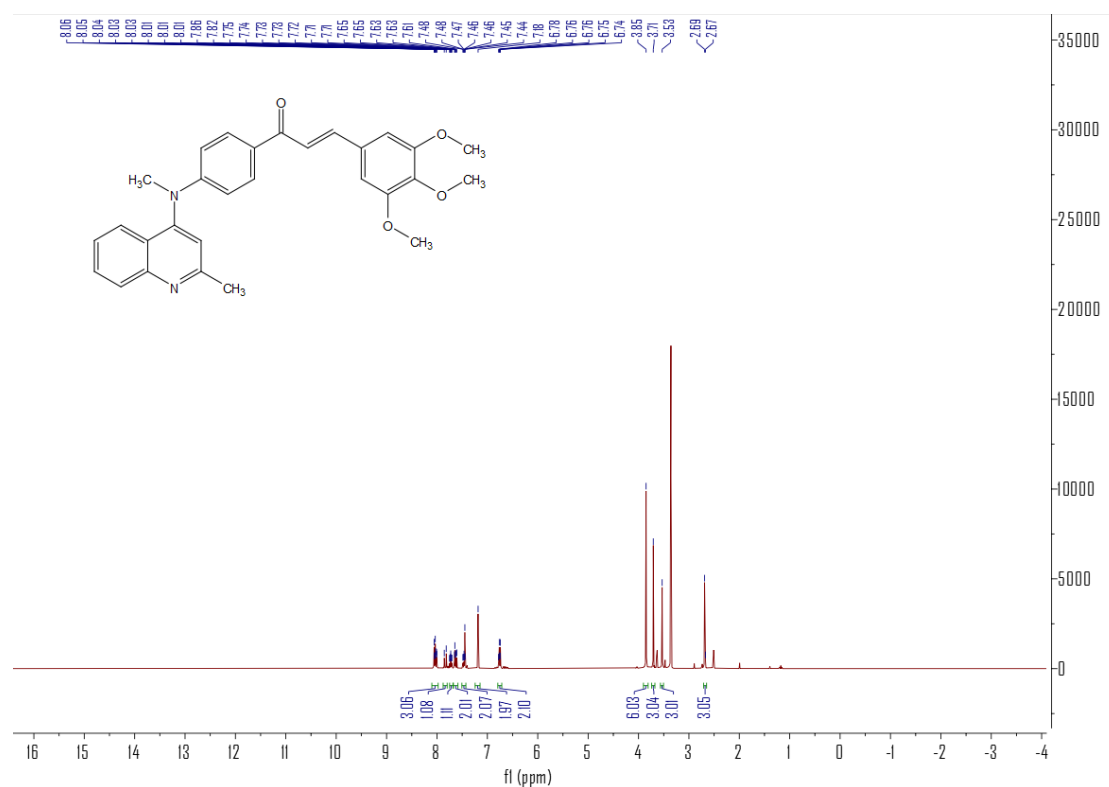

Figure S43 <sup>1</sup>H NMR spectrum of compound 13e

# <sup>13</sup>C NMR of compound 13e

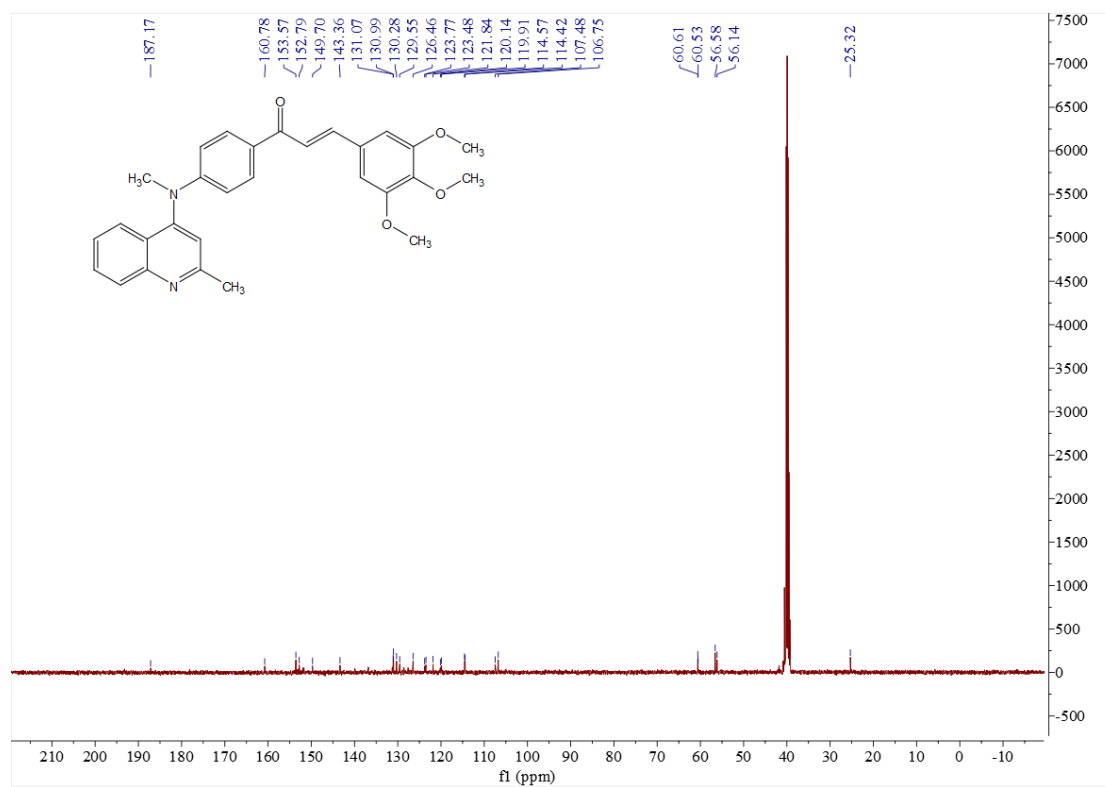

Figure S44 <sup>13</sup>C NMR spectrum of compound 13e

# HRMS spectrum of compound 13e

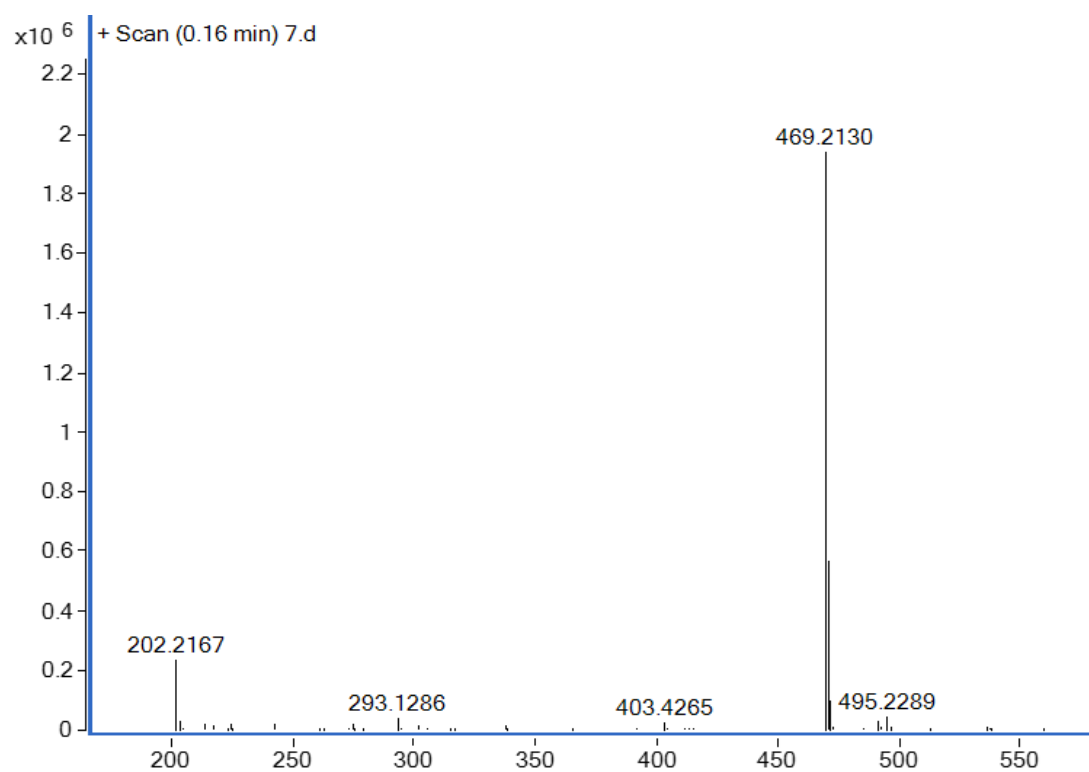

Figure S45 HRMS spectrum of compound 13e

# <sup>1</sup>H NMR of compound 13f

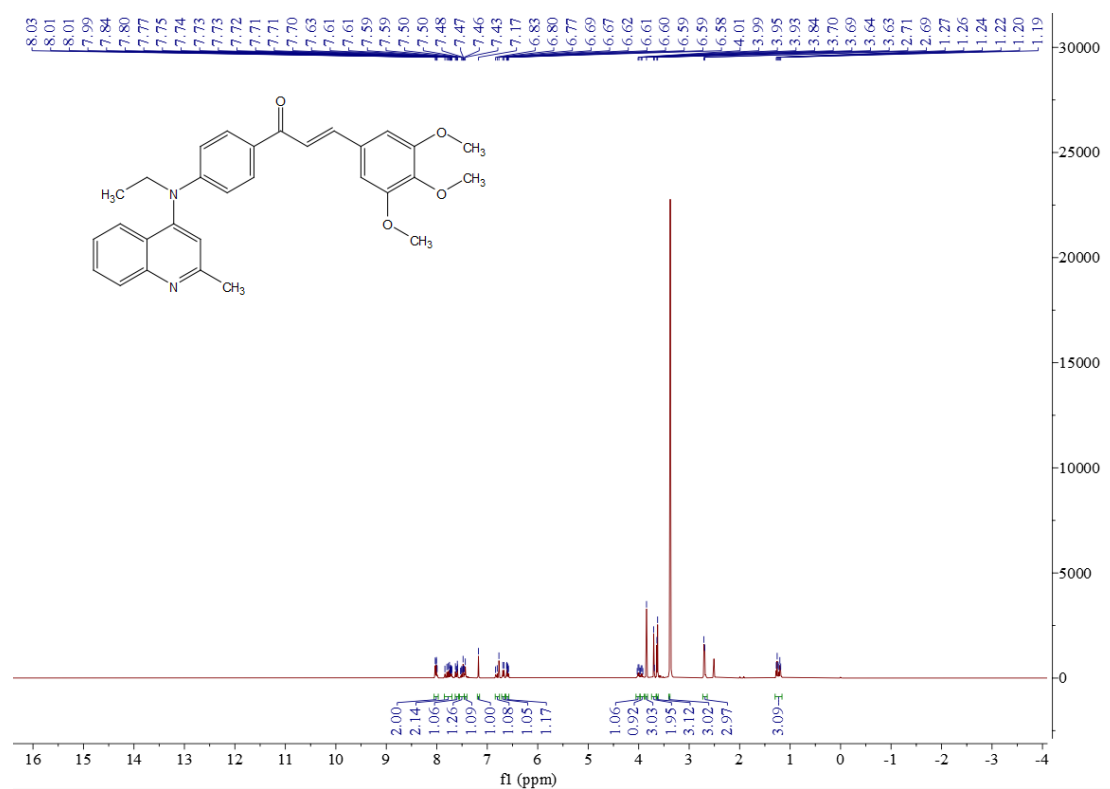

Figure S46 <sup>1</sup>H NMR spectrum of compound 13f

# <sup>13</sup>C NMR of compound 13f

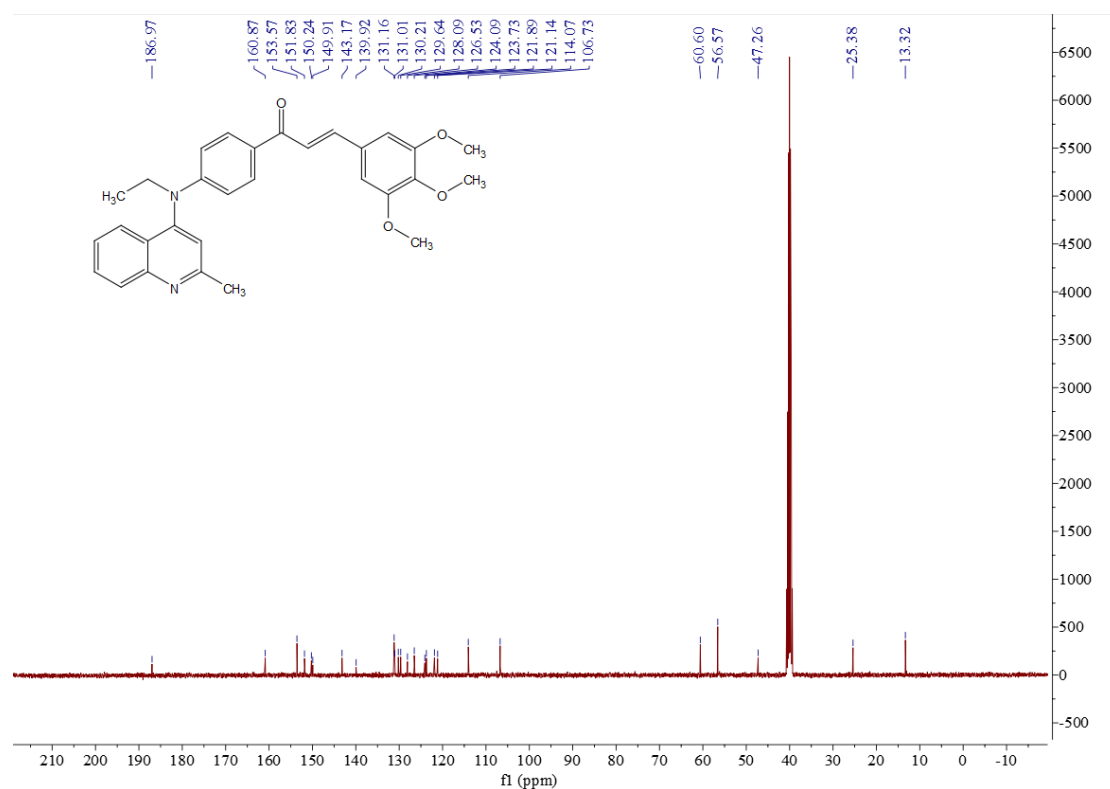

Figure S47 <sup>13</sup>C NMR spectrum of compound 13f

# HRMS spectrum of compound 13f

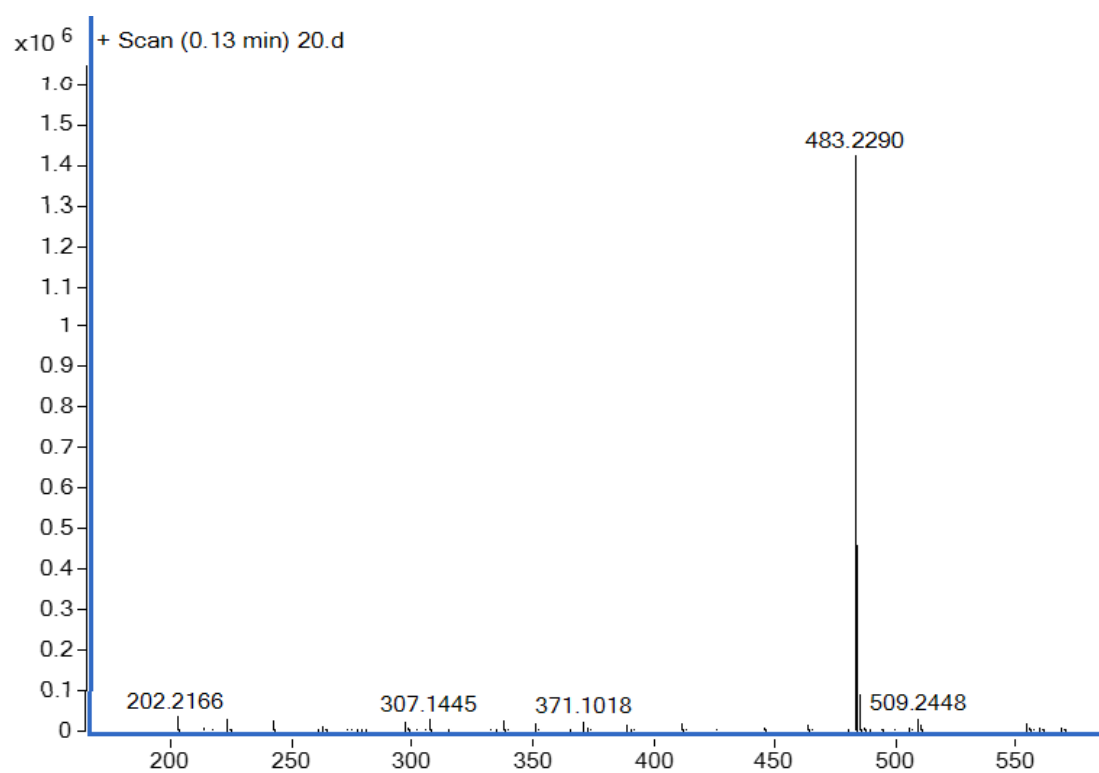

Figure S48 HRMS spectrum of compound 13f
